# Supplementary material for: Silver-catalyzed carbomagnesiation of terminal aryl and silyl alkynes and enynes in the presence of 1,2-dibromoethane
Source: Royal Society of Chemistry journal article supplement (doi:10.1039/b820521c), 2009-01-01

## Electronic Supplementary Information

### Silver-Catalyzed Carbomagnesiation of Terminal Alkynes and Enynes in the Presence of 1,2-Dibromoethane

Yuuki Fujii<sup>a</sup>, Jun Terao<sup>\*b</sup>, and Nobuaki Kambe<sup>\*a</sup>

<sup>a</sup> *Department of Molecular Chemistry & Science and Technology Center for Atoms, Molecules and Ions Control, Graduate School of Engineering, Osaka University, Yamadaoka 2-1, Suita, Osaka 565-0871, Japan*

<sup>b</sup> *Department of Energy and Hydrocarbon Chemistry, Graduate School of Engineering, Kyoto University, Kyoto, 615-8510, Japan*

#### General Comments

<sup>1</sup>H NMR and <sup>13</sup>C NMR spectra were recorded with a JEOL JNM-Alice 400 (400 MHz and 100 MHz, respectively) spectrometer. Chemical shifts are reported in parts per million ( $\delta$ ) downfield from internal tetramethylsilane. Infrared spectra were recorded with a Perkin-Elmer FT-IR (Model 1600). Both conventional and high resolution mass spectra were recorded with a JEOL JMS-DX303HF spectrometer. GC Mass spectra (EI) were obtained using a JMS-mate operating in the electron impact mode (70 eV) equipped with a RTX-5 30MX.25MMX.25U column. HPLC separations were performed on a recycling preparative HPLC (Japan Analytical Industry Co. Ltd., Model LC-908) equipped with JAIGEL-1H and -2H columns (GPC) using CHCl<sub>3</sub> as an eluent. Column chromatography was conducted using Kanto Chemical Co., Inc. silica gel 60 (63-210  $\mu$ m). Elemental analyses were performed on a Perkin Elmer 240C apparatus. GC yields were determined using octane as an internal standard. <sup>t</sup>Bu-MgCl, <sup>s</sup>Bu-MgCl, <sup>n</sup>Bu-MgCl, <sup>c</sup>Hex-MgCl, <sup>o</sup>Oct-MgCl, phenylacetylene, 2-ethynyltoluene, 3-ethynyltoluene, 4-ethynyltoluene, 4-ethynylanisole, 4-ethynyltrifluorotoluene, 3-ethynylthiophene, dimethylphenylsilylacetylene, benzaldehyde and chlorophenylsilane (Aldrich Chemical Company), 1,2-dibromoethane and cyclopentanone (Tokyo Chemical Industry Company), AgOTs, D<sub>2</sub>O (Wako Pure Chemical Industries) were purchased and used as received. (IMes)AgCl was prepared according to the literature (ref. [10]). Enynes **6a–c** were synthesized by Sonogashira coupling reactions of vinyl bromide with corresponding terminal alkynes.

## Procedures and Characterization of Reaction Products

### 3,3-Dimethyl-1-phenyl-1-butene (2a)

To a mixture of phenyl acetylene (101.9 mg, 1.0 mmol), 1,2-dibromoethane (185 mg, 1.0 mmol) and (IMes)AgCl (22.4 mg, 0.05 mmol) was added *tert*-butyl magnesium chloride (2.0 M in Et<sub>2</sub>O, 0.8 mL, 1.6 mmol) at -10 °C. After stirring for 30 min, aqueous 1N HCl was added and the product was extracted with ether, dried over Na<sub>2</sub>SO<sub>4</sub> and evaporated to give crude product. Purification by column chromatography on silica gel (pentane) gave 138 mg (88%) of **2a** as a mixture of stereoisomers (*E/Z* = 2/98). IR(NaCl): 3078, 3057, 2959, 2903, 2867, 1600, 1492, 1476, 1461, 1360, 1202, 1072, 1028, 918, 754, 699 cm<sup>-1</sup>; <sup>1</sup>H NMR (400 MHz, CDCl<sub>3</sub>) (*Z* isomer): δ 7.30-7.16 (m, 5H), 6.41 (d, *J* = 12.7 Hz, 1H), 5.60 (d, *J* = 12.7 Hz, 1H), 0.98 (s, 9H); <sup>13</sup>C NMR (100 MHz, CDCl<sub>3</sub>) (*Z* isomer): δ 142.6, 139.4, 128.9, 127.5, 127.1, 126.1, 34.2, 31.2; MS (EI) *m/z* (relative intensity, %): 160 (M, 28), 146 (11), 145 (100), 130 (11), 129 (8), 128 (8), 117 (19), 115 (8), 105 (9), 91 (21), 77 (6); HRMS (EI) calcd for C<sub>12</sub>H<sub>16</sub>: 160.1252, found 160.1255. Anal. Calcd for C<sub>12</sub>H<sub>16</sub>: C, 89.94; H, 10.06. found: C, 89.76; H, 10.27.

### 3,3-Dimethyl-1-(4-methylphenyl)-1-butene (2b)

To a mixture of 4-ethynyltoluene (114.5 mg, 0.99 mmol), 1,2-dibromoethane (187 mg, 1.0 mmol) and (IMes)AgCl (22.4 mg, 0.05 mmol) was added *tert*-butyl magnesium chloride (2.0 M in Et<sub>2</sub>O, 0.8 mL, 1.6 mmol) at -10 °C. After stirring for 30 min, aqueous 1N HCl was added and the product was extracted with ether, dried over Na<sub>2</sub>SO<sub>4</sub> and evaporated to give crude product. Purification by column chromatography on silica gel (pentane) gave 138 mg (80%) of **2b** as a mixture of stereoisomers (*E/Z* = 2/98). IR(NaCl): 2958, 2866, 1510, 1475, 1462, 1360, 1200, 1108, 1022, 902, 849, 775, 740 cm<sup>-1</sup>; <sup>1</sup>H NMR (400 MHz, CDCl<sub>3</sub>) (*Z* isomer): δ 7.07 (s, 4H), 6.37 (d, *J* = 12.7 Hz, 1H), 5.57 (d, *J* = 12.7 Hz, 1H), 2.33 (s, 3H), 0.98 (s, 9H); <sup>13</sup>C NMR (100 MHz, CDCl<sub>3</sub>) (*Z* isomer): δ 142.5, 136.3, 135.7, 128.8, 128.2, 127.1, 34.1, 31.2, 21.1; MS (EI) *m/z* (relative intensity, %): 174 (M, 30), 160 (12), 159 (100), 144 (13), 131 (11), 129 (9), 128 (8), 117 (8), 115 (8), 105 (16), 91 (6), 77 (3); HRMS (EI) calcd for C<sub>13</sub>H<sub>18</sub>: 174.1409, found 174.1413. Anal. Calcd for C<sub>13</sub>H<sub>18</sub>: C, 89.59; H, 10.41. found: C, 89.30; H, 10.27.

### 3,3-Dimethyl-1-(3-methylphenyl)-1-butene (2c)

To a mixture of 3-ethynyltoluene (114.2 mg, 0.98 mmol), 1,2-dibromoethane (185 mg, 1.0 mmol) and (IMes)AgCl (22.4 mg, 0.05 mmol) was added *tert*-butyl magnesium chloride (2.0 M in Et<sub>2</sub>O, 0.8 mL, 1.6 mmol) at -10 °C. After stirring for 30 min, aqueous 1N HCl was added and the product was extracted with ether, dried over Na<sub>2</sub>SO<sub>4</sub> and

evaporated to give crude product. Purification by column chromatography on silica gel (pentane) gave 141 mg (83%) of **2c** as a mixture of stereoisomers ( $E/Z = 2/98$ ). IR(NaCl): 2958, 2866, 1602, 1583, 1476, 1461, 1360, 1218, 812, 764, 738, 703  $\text{cm}^{-1}$ ;  $^1\text{H}$  NMR (400 MHz,  $\text{CDCl}_3$ ) ( $Z$  isomer):  $\delta$  7.15 (t,  $J = 7.4$  Hz, 1H), 7.02-6.97 (m, 3H), 6.37 (d,  $J = 12.7$  Hz, 1H), 5.57 (d,  $J = 12.7$  Hz, 1H), 2.33 (s, 3H), 0.98 (s, 9H);  $^{13}\text{C}$  NMR (100 MHz,  $\text{CDCl}_3$ ) ( $Z$  isomer):  $\delta$  142.4, 139.3, 137.0, 129.6, 127.4, 127.2, 126.8, 126.0, 34.2, 31.2, 21.4; MS (EI)  $m/z$  (relative intensity, %): 174 (M, 31), 160 (14), 159 (100), 144 (12), 131 (12), 129 (9), 128 (9), 119 (4), 117 (7), 115 (7), 105 (15), 91 (6), 77 (4); HRMS (EI) calcd for  $\text{C}_{13}\text{H}_{18}$ : 170.1409, found 174.1398. Anal. Calcd for  $\text{C}_{13}\text{H}_{18}$ : C, 89.59; H, 10.41. found: C, 89.40; H, 10.31.

### **3,3-Dimethyl-1-(2-methylphenyl)-1-butene (2d)**

To a mixture of 2-ethynyltoluene (114.9 mg, 0.99 mmol), 1,2-dibromoethane (188 mg, 1.0 mmol) and (IMes)AgCl (22.4 mg, 0.05 mmol) was added *tert*-butyl magnesium chloride (2.0 M in  $\text{Et}_2\text{O}$ , 0.8 mL, 1.6 mmol) at  $-10$   $^\circ\text{C}$ . After stirring for 30 min, aqueous 1N HCl was added and the product was extracted with ether, dried over  $\text{Na}_2\text{SO}_4$  and evaporated to give crude product. Purification by column chromatography on silica gel (pentane) gave 140 mg (81%) of **2d** as a mixture of stereoisomers ( $E/Z = 7/93$ ). IR(NaCl): 2958, 2866, 1475, 1461, 1360, 1234, 1205, 901, 752, 738  $\text{cm}^{-1}$ ;  $^1\text{H}$  NMR (400 MHz,  $\text{CDCl}_3$ ) ( $Z$  isomer):  $\delta$  7.14-7.08 (m, 4H), 6.26 (d,  $J = 12.7$  Hz, 1H), 5.61 (d,  $J = 12.7$  Hz, 1H), 2.24 (s, 3H), 0.93 (s, 9H);  $^{13}\text{C}$  NMR (100 MHz,  $\text{CDCl}_3$ ) ( $Z$  isomer):  $\delta$  142.1, 138.9, 125.7, 129.5, 129.2, 126.6, 126.2, 124.8, 34.3, 30.8, 20.3; MS (EI)  $m/z$  (relative intensity, %): 174 (M, 36), 160 (14), 159 (100), 145 (5), 144 (13), 131 (14), 129 (10), 128 (9), 117 (11), 115 (10), 105 (16), 104 (7), 91 (7), 77 (4); HRMS (EI) calcd for  $\text{C}_{13}\text{H}_{18}$ : 174.1409, found 174.1405. Anal. Calcd for  $\text{C}_{13}\text{H}_{18}$ : C, 89.59; H, 10.41. found: C, 89.50; H, 10.61.

### **3,3-Dimethyl-1-(4-methoxyphenyl)-1-butene (2e)**

To a mixture of 4-ethynylanisole (132.2 mg, 1.0 mmol), 1,2-dibromoethane (187 mg, 1.00 mmol) and (IMes)AgCl (22.4 mg, 0.05 mmol) was added *tert*-butyl magnesium chloride (2.0 M in  $\text{Et}_2\text{O}$ , 0.8 mL, 1.6 mmol) at  $-10$   $^\circ\text{C}$ . After stirring for 30 min, aqueous 1N HCl was added and the product was extracted with ether, dried over  $\text{Na}_2\text{SO}_4$  and evaporated to give crude product. Purification by column chromatography on silica gel (pentane/ether = 90/10) gave 133 mg (70%) of **2e** as a mixture of stereoisomers ( $E/Z = 2/98$ ). IR(NaCl): 2994, 2957, 2904, 2865, 2835, 1607, 1509, 1464, 1441, 1410, 1360, 1284, 1247, 1201, 1171, 1106, 1039, 851, 816, 783, 745  $\text{cm}^{-1}$ ;  $^1\text{H}$  NMR (400 MHz,

CDCl<sub>3</sub>) (*Z* isomer):  $\delta$  7.12-7.08 (m, 2H), 6.84-6.80 (m, 2H), 6.35 (d,  $J = 12.6$  Hz, 1H), 5.56 (d,  $J = 12.6$  Hz, 1H), 3.80 (s, 3H), 0.99 (s, 9H); <sup>13</sup>C NMR (100 MHz, CDCl<sub>3</sub>) (*Z* isomer):  $\delta$  158.0, 142.5, 131.6, 130.0, 126.8, 113.0, 55.2, 34.0, 31.2 MS (EI)  $m/z$  (relative intensity, %): 190 (M, 30), 176 (12), 175 (100), 160 (11), 146 (4), 145 (4), 128 (4), 121 (12), 115 (5), 91 (6), 77 (4); HRMS (EI) calcd for C<sub>13</sub>H<sub>18</sub>O: 190.1358, found 190.1360. Anal. Calcd for C<sub>13</sub>H<sub>18</sub>O: C, 82.06; H, 9.53. found: C, 81.77; H, 9.38.

### 3,3-Dimethyl-1-(4-trifluoromethylphenyl)-1-butene (2f)

To a mixture of 4-ethynyltrifluoromethylbenzene (167.8 mg, 0.99 mmol), 1,2-dibromoethane (184.7 mg, 0.99 mmol) and (IMes)AgCl (22.4 mg, 0.05 mmol) was added *tert*-butyl magnesium chloride (2.0 M in Et<sub>2</sub>O, 0.8 mL, 1.6 mmol) at -10 °C. After stirring for 30 min, aqueous 1N HCl was added and the product was extracted with ether, dried over Na<sub>2</sub>SO<sub>4</sub> and evaporated to give crude product. Purification by column chromatography on silica gel (pentane) gave 183 mg (81%) of **2f** as a mixture of stereoisomers (*E/Z* = 1/99). IR(NaCl): 2962, 2905, 2868, 1616, 1478, 1465, 1406, 1363, 1165, 1127, 1106, 1066, 1019, 903, 862, 814, 732 cm<sup>-1</sup>; <sup>1</sup>H NMR (400 MHz, CDCl<sub>3</sub>) (*Z* isomer):  $\delta$  7.53 (d,  $J = 8.1$  Hz, 2H), 7.29 (d,  $J = 8.1$  Hz, 2H), 6.38 (d,  $J = 12.9$  Hz, 1H), 5.68 (d,  $J = 12.9$  Hz, 1H), 0.97 (s, 9H); <sup>13</sup>C NMR (100 MHz, CDCl<sub>3</sub>) (*Z* isomer):  $\delta$  143.9, 143.3 (q,  $J = 1.4$  Hz), 129.2, 128.5 (q,  $J = 32.5$  Hz), 125.6, 124.5 (q,  $J = 3.7$  Hz), 124.3 (q,  $J = 270.4$  Hz), 34.3, 31.2; MS (EI)  $m/z$  (relative intensity, %): 228 (M, 30), 214 (15), 213 (100), 209 (7), 185 (23), 173 (7), 165 (8), 159 (21), 144 (5), 129 (6), 128 (6); HRMS (EI) calcd for C<sub>13</sub>H<sub>15</sub>F<sub>3</sub>: 228.1126, found 228.1140. Anal. Calcd for C<sub>13</sub>H<sub>15</sub>F<sub>3</sub>: C, 68.41; H, 6.62. found: C, 68.70; H, 6.68.

### 3,3-Dimethyl-1-(3-thienyl)-1-butene (2g)

To a mixture of 3-ethynylthiophene (109.2 mg, 1.01 mmol), 1,2-dibromoethane (191 mg, 1.02 mmol) and (IMes)AgCl (22.4 mg, 0.05 mmol) was added *tert*-butyl magnesium chloride (2.0 M in Et<sub>2</sub>O, 0.8 mL, 1.6 mmol) at -10 °C. After stirring for 30 min, aqueous 1N HCl was added and the product was extracted with ether, dried over Na<sub>2</sub>SO<sub>4</sub> and evaporated to give crude product. Purification by column chromatography on silica gel (pentane) gave 110 mg (65%) of **2g** as a mixture of stereoisomers (*E/Z* = 3/97). IR(NaCl): 2993, 2959, 2903, 2866, 1475, 1462, 1418, 1360, 1202, 1079, 890, 861, 836, 810, 758, 735, 683 cm<sup>-1</sup>; <sup>1</sup>H NMR (400 MHz, CDCl<sub>3</sub>):  $\delta$  7.22 (dd,  $J = 5.1, 2.8$  Hz, 1H), 6.98 (ddd,  $J = 2.8, 1.4, 1.2$  Hz, 1H), 6.94 (dd,  $J = 5.1, 1.2$  Hz, 1H), 6.21 (dd,  $J = 12.4, 1.4$  Hz, 1H), 5.62 (d,  $J = 12.4$  Hz, 1H), 1.02 (s, 9H); <sup>13</sup>C NMR (100 MHz, CDCl<sub>3</sub>):  $\delta$  144.1, 139.1, 129.3, 124.2, 122.1, 121.6, 33.8, 30.9; MS (EI)  $m/z$  (relative

intensity, %): 166 (M, 47), 153 (5), 152 (12), 151 (100), 136 (8), 135 (7), 134 (5), 123 (9), 118 (9), 117 (12), 111 (6), 105 (7), 97 (24), 91 (8), 77 (4), 67 (7), 65 (5), 59 (7); HRMS (EI) calcd for C<sub>10</sub>H<sub>14</sub>S: 166.0816, found 166.0812. Anal. Calcd for C<sub>10</sub>H<sub>14</sub>S: C, 72.23; H, 8.49. found: C, 72.40; H, 8.44.

### 3-Methyl-1-phenyl-1-pentene (2h)

To a mixture of phenyl acetylene (99.5 mg, 0.98 mmol), 1,2-dibromoethane (373 mg, 2.0 mmol) and AgOTs (14.0 mg, 0.05 mmol), P(*p*-C<sub>6</sub>H<sub>4</sub>Cl)<sub>3</sub> (18.3 mg, 0.05 mmol) was added *sec*-butyl magnesium chloride (2.0 M in Et<sub>2</sub>O, 0.8 mL, 1.6 mmol) at -10 °C. After stirring for 30 min, aqueous 1N HCl was added and the product was extracted with ether, dried over Na<sub>2</sub>SO<sub>4</sub> and evaporated to give crude product. Purification by HPLC with CHCl<sub>3</sub> as an eluent gave 106 mg (68%) of **2h** as a mixture of stereoisomers (*E/Z* = 14/86). IR(NaCl): 2961, 2926, 2873, 1600, 1493, 1456, 1378, 1074, 1030, 965, 916, 798, 778, 697 cm<sup>-1</sup>; <sup>1</sup>H NMR (400 MHz, CDCl<sub>3</sub>): δ 7.36-7.20 (m, 5H), 6.40-6.32 (m, 1H), 6.10 (dd, *J* = 15.9, 7.6 Hz, 0.14H), 5.43 (t, *J* = 11.1 Hz, 0.86H), 2.70-2.62 (m, 0.86H), 2.24-2.16 (m, 0.14H), 1.42-1.29 (m, 2H), 1.07 (d, *J* = 6.8 Hz, 0.42H), 1.03 (d, *J* = 6.6 Hz, 2.58 H), 0.92-0.84 (m, 3H); <sup>13</sup>C NMR (100 MHz, CDCl<sub>3</sub>) (*Z* isomer): δ 139.4, 136.8, 128.6, 128.1, 127.5, 126.3, 33.8, 30.3, 20.7, 11.8; (*E* isomer): δ 138.0, 136.8, 128.5, 128.1, 126.7, 125.9, 38.9, 29.8, 20.2, 11.9; MS (EI) *m/z* (relative intensity, %) (*Z* isomer): 160 (M, 25), 145 (6), 132 (12), 131 (100), 129 (7), 128 (5), 117 (5), 116 (8), 115 (9), 104 (8), 91 (23), 77 (4); HRMS (EI) calcd for C<sub>12</sub>H<sub>16</sub>: 160.1252, found 160.1243. Anal. Calcd for C<sub>12</sub>H<sub>16</sub>: C, 89.94; H, 10.06. found: C, 89.54; H, 9.80.

### 1-Cyclohexyl-2-phenylethene (2i)

To a mixture of phenyl acetylene (102.4 mg, 1.0 mmol), 1,2-dibromoethane (374 mg, 2.0 mmol) and AgOTs (14.0 mg, 0.05 mmol), P(*p*-C<sub>6</sub>H<sub>4</sub>Cl)<sub>3</sub> (18.3 mg, 0.05 mmol) was added cyclohexyl magnesium chloride (2.0 M in Et<sub>2</sub>O, 0.8 mL, 1.6 mmol) at -10 °C. After stirring for 30 min, aqueous 1N HCl was added and the product was extracted with ether, dried over Na<sub>2</sub>SO<sub>4</sub> and evaporated to give crude product. Purification by HPLC with CHCl<sub>3</sub> as an eluent gave 132 mg (71%) of **2i** as a mixture of stereoisomers (*E/Z* = 20/80). IR(NaCl): 3002, 2924, 2850, 1705, 1600, 1492, 1448, 1074, 1029, 957, 890, 788, 766, 697 cm<sup>-1</sup>; <sup>1</sup>H NMR (400 MHz, CDCl<sub>3</sub>): δ 7.35-7.16 (m, 5H), 6.36-6.29 (m, 1H), 6.18 (dd, *J* = 16.0, 7.0 Hz, 0.2H), 5.48 (t, *J* = 10.9 Hz, 0.8H), 2.61-2.54 (m, 0.8H), 2.18-2.07 (m, 0.2H), 1.82-1.65 (m, 5H), 1.36-1.12 (m, 5H); <sup>13</sup>C NMR (100 MHz, CDCl<sub>3</sub>) (*Z* isomer): δ 139.0, 137.9, 128.6, 128.2, 126.8, 126.4, 36.9, 33.2, 26.01, 25.7; (*E* isomer): δ 138.0, 136.9, 128.5, 127.1, 126.7, 125.9, 41.2, 32.9, 26.2, 26.04; MS (EI)

$m/z$  (relative intensity, %) (*Z* isomer): 186 (M, 30), 143 (9), 130 (7), 129 (22), 128 (14), 117 (9), 115 (12), 105 (12), 104 (100), 95 (8), 91 (13); HRMS (EI) calcd for C<sub>14</sub>H<sub>18</sub>: 186.1409, found 186.1413. Anal. Calcd for C<sub>14</sub>H<sub>18</sub>: C, 90.26; H, 9.74. found: C, 89.98; H, 9.78.

### 1-Phenyl-1-hexene (2j)

To a mixture of phenyl acetylene (101.6 mg, 1.0 mmol), 1,2-dibromoethane (373 mg, 2.0 mmol) and (IMes)AgCl (22.4 mg, 0.05 mmol) was added *n*-butyl magnesium chloride (2.0 M in Et<sub>2</sub>O, 1.0 mL, 2.0 mmol) at -10 °C. After stirring for 3 h, aqueous 1N HCl was added and the product was extracted with ether, dried over Na<sub>2</sub>SO<sub>4</sub> and evaporated to give crude product. Purification by HPLC with CHCl<sub>3</sub> as an eluent gave 91 mg (58%) of **2j** as a mixture of stereoisomers (*E/Z* = 43/57). IR(NaCl): 3026, 2957, 2929, 2903, 2872, 2859, 1706, 1600, 1494, 1455, 1378, 1272, 1072, 1027, 965, 748, 699 cm<sup>-1</sup>; <sup>1</sup>H NMR (400 MHz, CDCl<sub>3</sub>): δ 7.35-7.16 (m, 5H), 6.41-6.36 (m, 1H), 6.22 (dt, *J* = 15.6, 6.8 Hz, 0.43H), 5.66 (dt, *J* = 11.7, 7.4 Hz, 0.57H), 2.36-2.30 (m, 1.14H), 2.24-2.18 (m, 0.86H), 1.49-1.30 (m, 4H), 0.94-0.88 (m, 3H); <sup>13</sup>C NMR (100 MHz, CDCl<sub>3</sub>) (*Z* isomer): δ 137.8, 133.2, 128.7, 128.6, 128.1, 126.4, 32.1, 28.3, 22.4, 14.0; (*E* isomer): δ 137.9, 131.2, 129.7, 128.4, 126.7, 125.9, 32.7, 31.5, 22.3, 14.0; MS (EI)  $m/z$  (relative intensity, %) (*Z* isomer): 160 (M, 41), 131 (5), 118 (12), 117 (100), 116 (8), 115 (28), 105 (6), 104 (59), 92 (4), 91 (22), 77 (4); (*E* isomer): 160 (M, 40), 131 (5), 118 (11), 117 (100), 116 (8), 115 (26), 105 (6), 104 (54), 91 (21), 77 (4); HRMS (EI) calcd for C<sub>12</sub>H<sub>16</sub>: 160.1252, (*Z* isomer): found 160.1234; (*E* isomer): found 160.1235. Anal. Calcd for C<sub>12</sub>H<sub>16</sub>: C, 89.94; H, 10.06. found: C, 89.70; H, 9.77.

### 1-Phenyl-1-decene (2k)

To a mixture of phenyl acetylene (103.5 mg, 1.0 mmol), 1,2-dibromoethane (373 mg, 2.0 mmol) and (IMes)AgCl (22.4 mg, 0.05 mmol) was added *n*-octyl magnesium bromide (2.0 M in Et<sub>2</sub>O, 1.0 mL, 2.0 mmol) at -10 °C. After stirring for 3 h, aqueous 1N HCl was added and the product was extracted with ether, dried over Na<sub>2</sub>SO<sub>4</sub> and evaporated to give crude product. Purification by column chromatography on silica gel (pentane) and HPLC with CHCl<sub>3</sub> as an eluent gave 158 mg (73%) of **2k** as a mixture of stereoisomers (*E/Z* = 42/58). IR(NaCl): 3025, 2924, 2854, 1600, 1494, 1466, 1448, 963, 768, 742, 698 cm<sup>-1</sup>; <sup>1</sup>H NMR (400 MHz, CDCl<sub>3</sub>): δ 7.35-7.16 (m, 5H), 6.41-6.35 (m, 1H), 6.23 (dt, *J* = 15.6, 6.8 Hz, 0.42H), 5.66 (dt, *J* = 11.7, 7.3 Hz, 0.58H), 2.35-2.29 (m, 1.16H), 2.22-2.17 (m, 0.84H), 1.48-1.40 (m, 2H), 1.35-1.26 (m, 10H), 0.90-0.86 (m, 3H); <sup>13</sup>C NMR (100 MHz, CDCl<sub>3</sub>) (*Z* isomer): δ 137.8, 133.3, 128.7, 128.6, 128.1,

126.4, 31.9, 30.0, 29.5, 29.4, 29.3, 28.6, 22.7, 14.1; (*E* isomer):  $\delta$  137.9, 131.3, 129.6, 128.4, 126.7, 125.9, 33.1, 31.9, 29.5, 29.4, 29.3, 29.2, 22.7, 14.1; MS (EI)  $m/z$  (relative intensity, %) (*Z* isomer): 216 (M, 23), 131 (5), 118 (12), 117 (74), 116 (5), 115 (16), 105 (11), 104 (100), 92 (6), 91 (23), 77 (3); (*E* isomer): 216 (M, 26), 131 (5), 118 (11), 117 (79), 116 (6), 115 (17), 105 (10), 104 (100), 92 (5), 91 (21), 77 (2); HRMS (EI) calcd for C<sub>16</sub>H<sub>24</sub>: 216.1878, (*Z* isomer): found 216.1866; (*E* isomer): found 216.1876. Anal. Calcd for C<sub>16</sub>H<sub>24</sub>: C, 88.82; H, 11.18. found: C, 88.56; H, 10.98.

### **3,3-Dimethyl-1-dimethylphenylsilyl-1-butene (2l)**

To a mixture of dimethylphenylsilyl acetylene (158.5 mg, 0.99 mmol), 1,2-dibromoethane (376 mg, 1.0 mmol) and (IMes)AgCl (22.4 mg, 0.05 mmol) was added *tert*-butyl magnesium chloride (2.0 M in Et<sub>2</sub>O, 1.0 mL, 2.0 mmol) at -10 °C. After stirring for 3 h, aqueous 1N HCl was added and the product was extracted with ether, dried over Na<sub>2</sub>SO<sub>4</sub> and evaporated to give crude product. Purification by HPLC with CHCl<sub>3</sub> as an eluent gave 142 mg (66%) of **2l** as a mixture of stereoisomers (*E/Z* = 8/92). IR(NaCl): 3051, 2956, 2905, 2867, 1596, 1476, 1464, 1428, 1360, 1248, 1112, 822, 786, 731, 700 cm<sup>-1</sup>; <sup>1</sup>H NMR (400 MHz, CDCl<sub>3</sub>) (*Z* isomer):  $\delta$  7.56-7.52 (m, 2H), 7.36-7.30 (m, 3H), 6.48 (d, *J* = 15.6 Hz, 1H), 5.51 (d, *J* = 15.6 Hz, 1H), 0.96 (s, 9H), 0.41 (s, 6H); <sup>13</sup>C NMR (100 MHz, CDCl<sub>3</sub>) (*Z* isomer):  $\delta$  161.7, 140.9, 133.7, 128.6, 127.6, 122.6, 35.6, 30.0, 0.83; MS (EI)  $m/z$  (relative intensity, %): 218 (M, 5), 204 (8), 203 (40), 162 (9), 161 (60), 149 (6), 148 (10), 145 (6), 136 (13), 135 (100), 125 (10), 121 (31), 119 (5), 107 (6), 105 (12), 91 (4), 73 (30), 59 (9); HRMS (EI) calcd for C<sub>14</sub>H<sub>22</sub>Si: 218.1491, found 218.1501. Anal. Calcd for C<sub>14</sub>H<sub>22</sub>Si: C, 76.99; H, 10.15. found: C, 76.72; H, 10.10.

### **1-Deuterio-3,3-dimethyl-1-phenyl-1-butene (3a)**

To a mixture of phenyl acetylene (100 mg, 0.98 mmol), 1,2-dibromoethane (185.4 mg, 0.99 mmol) and (IMes)AgCl (22.4 mg, 0.05 mmol) was added *tert*-butyl magnesium chloride (2.0 M in Et<sub>2</sub>O, 0.8 mL, 1.6 mmol) at -10 °C. After stirring for 30 min, D<sub>2</sub>O was added to the solution at -10 °C. After stirring for 3 h at 25 °C, aqueous 1N HCl was added and the product was extracted with ether, dried over Na<sub>2</sub>SO<sub>4</sub> and evaporated to give crude product. Purification by column chromatography on silica gel (pentane) gave 146 mg (94%) of **3a** as a mixture of stereoisomers (*E/Z* = 2/98). IR(NaCl): 3020, 2959, 2904, 2867, 1599, 1492, 1475, 1461, 1442, 1361, 1202, 1028, 918, 744, 721, 697 cm<sup>-1</sup>; <sup>1</sup>H NMR (400 MHz, CDCl<sub>3</sub>) (*Z* isomer):  $\delta$  7.29-7.17 (m, 5H), 5.60 (t, *J* = 1.8 Hz, 1H), 0.98 (s, 9H); <sup>13</sup>C NMR (100 MHz, CDCl<sub>3</sub>) (*Z* isomer):  $\delta$  142.6, 139.3, 129.0,

127.5, 126.8 (t,  $J = 23.6$  Hz), 126.2, 34.1, 31.2; MS (EI)  $m/z$  (relative intensity, %): 161 (M, 27), 147 (12), 146 (100), 131 (10), 130 (7), 129 (7), 118 (13), 106 (6), 92 (15), 91 (7); HRMS (EI) calcd for  $C_{12}H_{15}D$ : 161.1314, found 161.1315. Anal. Calcd for  $C_{12}H_{15}D$ : C, 89.38; H and D, 10.62. found: C, 89.17; H and D, 10.83.

#### 4,4-Dimethyl-2-phenyl-2-pentenoic acid (3b)

To a mixture of phenyl acetylene (100.7 mg, 0.99 mmol), 1,2-dibromoethane (187 mg, 1.00 mmol) and (IMes)AgCl (22.4 mg, 0.05 mmol) was added *tert*-butyl magnesium chloride (2.0 M in  $Et_2O$ , 0.8 mL, 1.6 mmol) at  $-10$  °C. After stirring for 30 min, dry  $Et_2O$  (0.8 mL) and  $CO_2$  was added to the solution at  $-10$  °C. Aqueous 1N HCl was added and the product was extracted with ether, dried over  $Na_2SO_4$  and evaporated to give crude product. Purification by column chromatography on silica gel (hexane/ether = 1/2) gave 178 mg (88%) of **3b** as a mixture of stereoisomers ( $E/Z = 98/2$ ). Mp: 129-133 °C; IR(KBr): 2965, 1674, 1423, 1268, 922, 784, 702  $cm^{-1}$ ;  $^1H$  NMR (400 MHz,  $CDCl_3$ ) (*Z* isomer):  $\delta$  7.33-7.29 (m, 3H), 7.16-7.13 (m, 3H), 0.92 (s, 9H);  $^{13}C$  NMR (100 MHz,  $CDCl_3$ ) (*Z* isomer):  $\delta$  173.2, 155.8, 135.6, 130.6, 130.1, 127.6, 127.5, 34.4, 30.2; MS (EI)  $m/z$  (relative intensity, %): 204 (M, 100), 189 (30), 186 (11), 171 (14), 161 (14), 159 (21), 146 (37), 145 (16), 144 (14), 143 (82), 129 (21), 128 (41), 127 (11), 118 (18), 117 (52), 116 (9), 115 (20), 103 (12), 102 (9), 91 (16), 77 (16), 59 (37); HRMS (EI) calcd for  $C_{13}H_{16}O_2$ : 204.1150, found 204.1154. Anal. Calcd for  $C_{13}H_{16}O_2$ : C, 76.44; H, 7.90. found: C, 76.23; H, 7.65.

#### 4,4-Dimethyl-1,2-diphenyl-2-pentene-1-ol (3c)

To a mixture of phenyl acetylene (105.5 mg, 1.03 mmol), 1,2-dibromoethane (189 mg, 1.01 mmol) and (IMes)AgCl (22.4 mg, 0.05 mmol) was added *tert*-butyl magnesium chloride (2.0 M in  $Et_2O$ , 0.8 mL, 1.6 mmol) at  $-10$  °C. After stirring for 30 min, dry  $Et_2O$  (0.8 mL) and benzaldehyde (212 mg, 2.0 mmol) was added to the solution at  $-10$  °C. After stirring for 3 h at 25 °C, aqueous 1N HCl was added and the product was extracted with ether, dried over  $Na_2SO_4$  and evaporated to give crude product. Purification by column chromatography on silica gel (hexane/ether = 90/10) gave 223 mg (81%) of **3c** as a mixture of stereoisomers ( $E/Z = 98/2$ ). IR(NaCl): 3391, 3058, 3029, 2957, 2901, 2866, 1600, 1574, 1493, 1475, 1452, 1360, 1220, 1190, 1069, 1029, 1005, 916, 775, 763  $cm^{-1}$ ;  $^1H$  NMR (400 MHz,  $CDCl_3$ ) (*Z* isomer):  $\delta$  7.29-7.12 (m, 8H), 6.80-6.77 (m, 2H), 5.90 (s, 1H), 5.26 (d,  $J = 4.9$  Hz, 1H), 1.96 (d,  $J = 4.9$  Hz, 1H), 0.88 (s, 9H);  $^{13}C$  NMR (100 MHz,  $CDCl_3$ ) (*Z* isomer):  $\delta$  142.1, 140.1, 138.7, 137.7, 130.3, 128.0, 127.25, 127.21, 126.8, 126.5, 80.2, 33.4, 31.2; MS (EI)  $m/z$  (relative intensity,



266 (M, 1), 209 (20), 208 (10), 161 (10), 160 (69), 146 (12), 145 (100), 131 (5), 129 (8), 128 (7), 117 (17), 107 (32), 105 (13), 103 (8), 91 (9), 79 (14), 77 (15), 57 (23); HRMS (EI) calcd for C<sub>19</sub>H<sub>22</sub>O: 266.1671, found 266.1674. Anal. Calcd for C<sub>19</sub>H<sub>22</sub>O: C, 85.67; H, 8.32. found: C, 85.38; H, 8.26.

### **3,3-Dimethyl-1-phenyl-1-phenylsilyl-1-butene (3d)**

To a mixture of phenyl acetylene (101 mg, 0.99 mmol), 1,2-dibromoethane (188 mg, 1.01 mmol) and (IMes)AgCl (22.4 mg, 0.05 mmol) was added *tert*-butyl magnesium chloride (2.0 M in Et<sub>2</sub>O, 0.8 mL, 1.6 mmol) at -10 °C. After stirring for 30 min, dry THF (1.2 mL) and chlorophenylsilane (0.27 mL, 2.0 mmol) was added to the solution at -10 °C. After stirring for 1 h at 25 °C, aqueous 1N HCl was added and the product was extracted with ether, dried over Na<sub>2</sub>SO<sub>4</sub> and evaporated to give a crude product. Purification by column chromatography on silica gel (pentane) and HPLC with CHCl<sub>3</sub> as an eluent gave 194 mg (74%) of **3d** as a mixture of stereoisomers (*E/Z* = 98/2). IR(NaCl): 3053, 2958, 2901, 2867, 2134, 1608, 1592, 1490, 1494, 1462, 1429, 1360, 1205, 1115, 1071, 951, 924, 890, 839, 732, 712, 699 cm<sup>-1</sup>; <sup>1</sup>H NMR (400 MHz, CDCl<sub>3</sub>) (*Z* isomer): δ 7.47-7.45 (m, 2H), 7.38-7.29 (m, 3H), 7.21-7.10 (m, 3H), 6.96-6.94 (m, 2H), 6.18 (s, 1H), 4.59 (s, 2H), 0.91 (s, 9H); <sup>13</sup>C NMR (100 MHz, CDCl<sub>3</sub>) (*Z* isomer): δ 154.9, 141.5, 135.6, 134.5, 132.0, 129.6, 128.2, 127.8, 127.6, 125.3, 36.6, 30.9; MS (EI) *m/z* (relative intensity, %): 266 (M, 44), 224 (21), 223 (53), 209 (32), 207 (12), 197 (19), 196 (68), 195 (15), 184 (18), 183 (100), 181 (14), 173 (15), 159 (54), 158 (14), 157 (20), 143 (13), 131 (37), 128 (10), 121 (15), 117 (24), 107 (32), 105 (58), 57 (15); HRMS (EI) calcd for C<sub>18</sub>H<sub>22</sub>Si: 266.1491, found 266.1493. Anal. Calcd for C<sub>18</sub>H<sub>22</sub>Si: C, 81.14; H, 8.32. found: C, 80.99; H, 8.33.

### **2,2-Dimethyl-dodec-5-yne (7a) and 2,2-Dimethyl-dodeca-4,5-diene (7b)**

To a mixture of dec-1-en-3-yne **6a** (66 mg, 0.49 mmol), 1,2-dibromoethane (93.2 mg, 0.50 mmol) and (IMes)AgCl (11.2 mg, 0.025 mmol) was added *tert*-butyl magnesium chloride (2.0 M in Et<sub>2</sub>O, 0.4 mL, 0.8 mmol) at -10 °C. After stirring for 30 min, aqueous 1N HCl was added and the product was extracted with ether, dried over Na<sub>2</sub>SO<sub>4</sub> and evaporated to give crude product. Purification by column chromatography on silica gel (pentane) gave 60 mg (64%) of **7a** and 24 mg (26%) of **7b**. **7a**: IR(NaCl): 2955, 2932, 2859, 1467, 1365, 1248 cm<sup>-1</sup>; <sup>1</sup>H NMR (400 MHz, CDCl<sub>3</sub>): δ 2.15-2.08 (m, 4H), 1.49-1.26 (m, 10H), 0.90-0.87 (m, 12H); <sup>13</sup>C NMR (100 MHz, CDCl<sub>3</sub>): δ 80.9, 79.8, 43.5, 31.4, 30.3, 29.1, 29.0, 28.6, 22.6, 18.8, 14.3, 14.1; MS (EI) *m/z* (relative intensity, %): 194 (M, 4), 179 (10), 165 (11), 151 (9), 123 (19), 110 (13), 109 (67), 97 (8), 96 (26), 95 (64), 83 (15), 82 (18), 81 (64), 71 (19), 70 (12), 69

(29), 68 (19), 67 (39), 57 (100), 55 (20), 43 (28), 41 (28); HRMS (EI) calcd for C<sub>14</sub>H<sub>26</sub>: 194.2035, found 194.2040. Anal. Calcd for C<sub>14</sub>H<sub>26</sub>: C, 86.52; H, 13.48. found: C, 86.28; H, 13.60. **7b**: IR(NaCl): 2956, 2928, 2858, 1963, 1467, 1378, 1242, 1199, 883 cm<sup>-1</sup>; <sup>1</sup>H NMR (400 MHz, CDCl<sub>3</sub>): δ 5.05-5.00 (m, 2H), 2.01-1.94 (m, 2H), 1.89-1.86 (m, 2H), 1.43-1.24 (m, 8H), 0.94-0.87 (m, 12H); <sup>13</sup>C NMR (100 MHz, CDCl<sub>3</sub>): δ 205.2, 89.5, 87.6, 44.0, 31.7, 31.2, 29.3, 29.04, 29.00, 28.8, 22.6, 14.1; MS (EI) *m/z* (relative intensity, %): 194 (M, 0.3), 124 (29), 109 (11), 96 (6), 95 (12), 81 (13), 69 (6), 68 (36), 67 (12), 57 (100), 54 (8), 41 (15); HRMS (EI) calcd for C<sub>14</sub>H<sub>26</sub>: 194.2035, found 194.2049. Anal. Calcd for C<sub>14</sub>H<sub>26</sub>: C, 86.52; H, 13.48. found: C, 86.25; H, 13.45.

### **1-[1-(2,2-Dimethyl-propyl)-non-2-ynyl]-cyclopentanol (9a)**

To a mixture of dec-1-en-3-yne **6a** (66 mg, 0.49 mmol), 1,2-dibromoethane (92.6 mg, 0.50 mmol) and (IMes)AgCl (11.2 mg, 0.025 mmol) was added *tert*-butyl magnesium chloride (2.0 M in Et<sub>2</sub>O, 0.4 mL, 0.8 mmol) at -10 °C. After stirring for 30 min, dry Et<sub>2</sub>O (1.2 mL) and cyclopentanone (83.2 mg, 0.99 mmol) was added to the solution at -10 °C. After stirring for 1 h at -10 °C, aqueous 1N HCl was added and the product was extracted with ether, dried over Na<sub>2</sub>SO<sub>4</sub> and evaporated to give a crude product. Purification by column chromatography on silica gel (hexane/Et<sub>2</sub>O = 95/5) gave 114 mg (85%) of **9a**. IR(NaCl): 3461, 2956, 2861, 1468, 1394, 1365, 1328, 1247, 1197, 999, 909, 884 cm<sup>-1</sup>; <sup>1</sup>H NMR (400 MHz, CDCl<sub>3</sub>): δ 2.39 (tt, *J* = 4.9, 2.2 Hz, 1H), 2.15 (td, *J* = 6.8, 2.2 Hz, 2H), 1.86-1.58 (m, 11H), 1.52-1.24 (m, 8H), 0.96 (s, 9H), 0.89 (t, *J* = 6.6 Hz, 3H); <sup>13</sup>C NMR (100 MHz, CDCl<sub>3</sub>): δ 84.5, 82.9, 82.8, 44.6, 38.8, 38.5, 37.2, 31.3, 30.6, 29.8, 29.0, 28.6, 24.4, 24.3, 22.6, 18.8, 14.0; MS (CI) *m/z* (relative intensity, %): 279 (M+1, 6), 262 (21), 261 (100), 205 (22), 191 (23), 177 (11), 165 (5), 151 (5), 124 (7), 109 (8); HRMS (CI) calcd for C<sub>19</sub>H<sub>35</sub>O: 279.2688, found 279.2687. Anal. Calcd for C<sub>19</sub>H<sub>34</sub>O: C, 81.95; H, 12.31. found: C, 81.62; H, 12.30.

### **1-[1-(2-Methyl-butyl)-non-2-ynyl]-cyclopentanol (9b)**

To a mixture of dec-1-en-3-yne **6a** (67.5 mg, 0.50 mmol), 1,2-dibromoethane (91.3 mg, 0.49 mmol) and (IMes)AgCl (11.2 mg, 0.025 mmol) was added *sec*-butyl magnesium chloride (2.0 M in Et<sub>2</sub>O, 0.4 mL, 0.8 mmol) at -10 °C. After stirring for 3 h, dry Et<sub>2</sub>O (1.2 mL) and cyclopentanone (84.4 mg, 1.0 mmol) was added to the solution at -10 °C. After stirring for 1 h at -10 °C, aqueous 1N HCl was added and the product was extracted with ether, dried over Na<sub>2</sub>SO<sub>4</sub> and evaporated to give a crude product. Purification by column chromatography on silica gel (pentane/Et<sub>2</sub>O = 95/5) gave 113 mg (81%) of **9b** as a mixture of diastereomers with ca. 1:1 ratio indicated by <sup>1</sup>H, <sup>13</sup>C

NMR and GC. A 1:1 mixture of diastereomers; IR(NaCl): 3454, 2958, 2872, 1463, 1378, 1328, 1272, 1196, 1066, 998, 906  $\text{cm}^{-1}$ ;  $^1\text{H}$  NMR (400 MHz,  $\text{CDCl}_3$ ):  $\delta$  2.50-2.44 (m, 1H), 2.19-2.15 (m, 2H), 1.83-1.57 (m, 11H), 1.52-1.23 (m, 10H), 1.10-0.99 (m, 1H), 0.94-0.85 (m, 9H);  $^{13}\text{C}$  NMR (100 MHz,  $\text{CDCl}_3$ ):  $\delta$  83.85, 83.81, 83.3, 83.2, 80.9, 80.7, 40.9, 40.8, 39.41, 39.35, 37.2, 37.10, 37.05, 37.0, 32.6, 32.3, 31.3, 30.7, 29.0, 28.49, 28.47, 27.3, 24.29, 24.28, 23.91, 23.90, 22.6 (2C), 20.1 (2C), 18.7, 18.3, 14.0 (2C), 11.5 (2C), 10.8 (2C); MS (CI)  $m/z$  (relative intensity, %): 279 (M+1, 13), 262 (22), 261 (100), 192 (6), 191 (54), 179 (8), 177 (8), 165 (8), 138 (9), 123 (8), 109 (14), 95 (7), 85 (5); HRMS (CI) calcd for  $\text{C}_{19}\text{H}_{35}\text{O}$ : 279.2688, found 279.2684. Anal. Calcd for  $\text{C}_{19}\text{H}_{34}\text{O}$ : C, 81.95; H, 12.31. found: C, 81.66; H, 12.42.

#### **1-[1-(2,2-Dimethyl-propyl)-3-phenyl-prop-2-ynyl]-cyclopentanol (9d)**

To a mixture of but-3-en-1-ynyl-benzene **6b** (63.1 mg, 0.49 mmol), 1,2-dibromoethane (91.6 mg, 0.50 mmol) and (IMes)AgCl (11.2 mg, 0.025 mmol) was added *tert*-butyl magnesium chloride (2.0 M in  $\text{Et}_2\text{O}$ , 0.4 mL, 0.8 mmol) at  $-10\text{ }^\circ\text{C}$ . After stirring for 30 min, dry  $\text{Et}_2\text{O}$  (1.2 mL) and cyclopentanone (84.4 mg, 1.0 mmol) was added to the solution at  $-10\text{ }^\circ\text{C}$ . After stirring for 1 h at  $-10\text{ }^\circ\text{C}$ , aqueous 1N HCl was added and the product was extracted with ether, dried over  $\text{Na}_2\text{SO}_4$  and evaporated to give a crude product. Purification by column chromatography on silica gel (hexane/ $\text{Et}_2\text{O}$  = 9/1) gave 115 mg (87%) of **9d**. IR(NaCl): 3452, 3055, 2955, 2868, 2228, 1699, 1634, 1598, 1489, 1472, 1442, 1365, 1245, 1197, 1070, 999, 911, 755, 691  $\text{cm}^{-1}$ ;  $^1\text{H}$  NMR (400 MHz,  $\text{CDCl}_3$ ):  $\delta$  7.39-7.36 (m, 2H), 7.29-7.26 (m, 3H), 2.66 (dd,  $J$  = 8.8, 3.4 Hz, 1H), 1.90-1.61 (m, 11H), 1.02 (s, 9H);  $^{13}\text{C}$  NMR (100 MHz,  $\text{CDCl}_3$ ):  $\delta$  131.4, 128.2, 127.7, 123.8, 92.9, 84.5, 82.9, 44.4, 39.2, 38.8, 37.7, 30.7, 29.8, 24.4, 24.3; MS (CI)  $m/z$  (relative intensity, %): 271 (M+1, 6), 254 (22), 253 (100), 197 (8), 186 (4), 130 (5); HRMS (CI) calcd for  $\text{C}_{19}\text{H}_{27}\text{O}$ : 271.2062, found 271.2067.

#### **1-[1-(2,2-Dimethyl-propyl)-3-trimethylsilyl-prop-2-ynyl]-cyclopentanol (9e)**

To a mixture of but-3-en-1-ynyl-trimethylsilane **6c** (63 mg, 0.51 mmol), 1,2-dibromoethane (91.3 mg, 0.49 mmol) and (IMes)AgCl (11.2 mg, 0.025 mmol) was added *tert*-butyl magnesium chloride (2.0 M in  $\text{Et}_2\text{O}$ , 0.4 mL, 0.8 mmol) at  $-10\text{ }^\circ\text{C}$ . After stirring for 30 min, dry  $\text{Et}_2\text{O}$  (1.2 mL) and cyclopentanone (81.8 mg, 0.97 mmol) was added to the solution at  $-10\text{ }^\circ\text{C}$ . After stirring for 1 h at  $-10\text{ }^\circ\text{C}$ , aqueous 1N HCl was added and the product was extracted with ether, dried over  $\text{Na}_2\text{SO}_4$  and evaporated to give a crude product. Purification by column chromatography on silica gel (pentane/ $\text{Et}_2\text{O}$  = 95/5) gave 115 mg (85%) of **9e**. IR(NaCl): 3458, 2956, 2869, 2165,

1475, 1394, 1366, 1250, 1197, 1066, 1000, 976, 874, 842, 759, 698  $\text{cm}^{-1}$ ;  $^1\text{H}$  NMR (400 MHz,  $\text{CDCl}_3$ ):  $\delta$  2.45 (dd,  $J = 9.6, 2.4$  Hz, 1H), 1.86-1.45 (m, 11H), 0.96 (s, 9H), 0.13 (s, 9H);  $^{13}\text{C}$  NMR (100 MHz,  $\text{CDCl}_3$ ):  $\delta$  110.2, 87.1, 84.1, 44.3, 39.5, 38.7, 37.3, 30.7, 29.8, 24.4, 24.3, 0.03; MS (CI)  $m/z$  (relative intensity, %): 267 (M+1, 2), 251 (6), 250 (23), 249 (100), 193 (9), 182 (5), 177 (7), 175 (7), 157 (7), 85 (5), 73 (7); HRMS (CI) calcd for  $\text{C}_{16}\text{H}_{31}\text{OSi}$ : 267.2144, found 267.2132. Anal. Calcd for  $\text{C}_{16}\text{H}_{30}\text{OSi}$ : C, 72.11; H, 11.35. found: C, 72.27; H, 11.28.

### Copies of $^1\text{H}$ and $^{13}\text{C}$ NMR Spectra of 2a-l, 3a-d, 7a-b, 9a, 9b, 9d and 9e

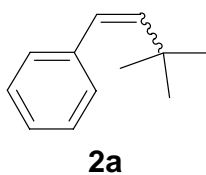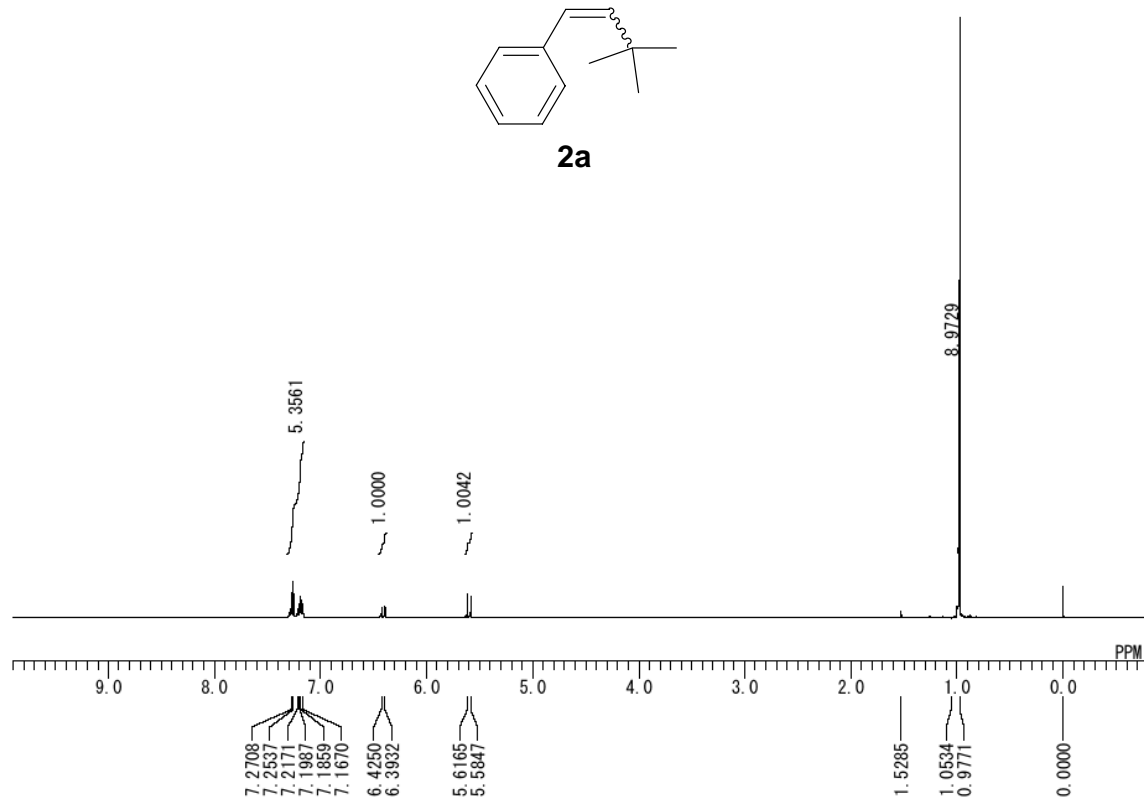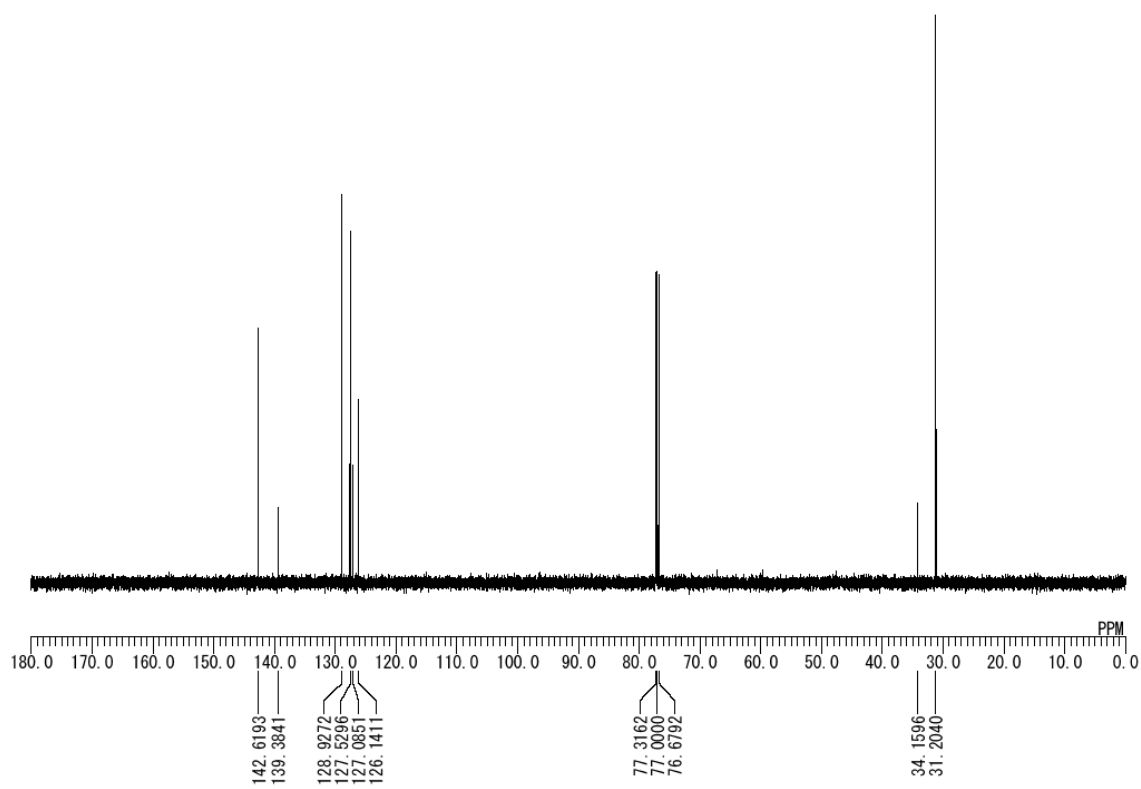

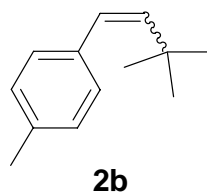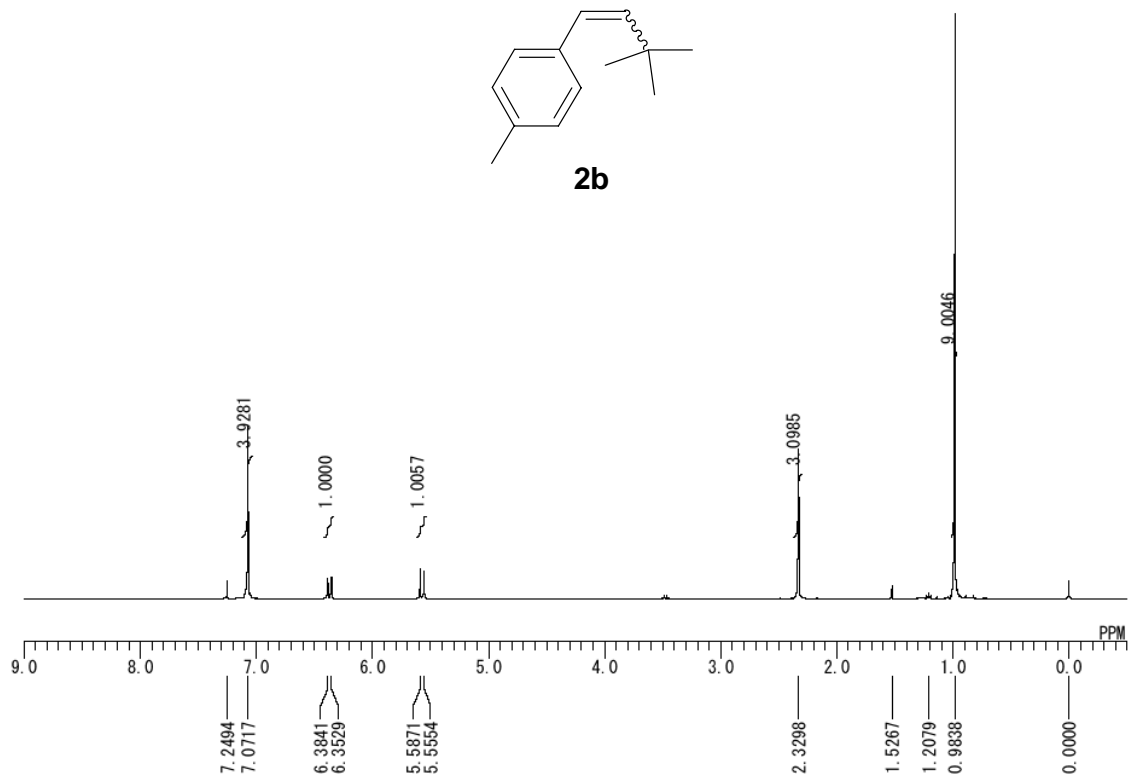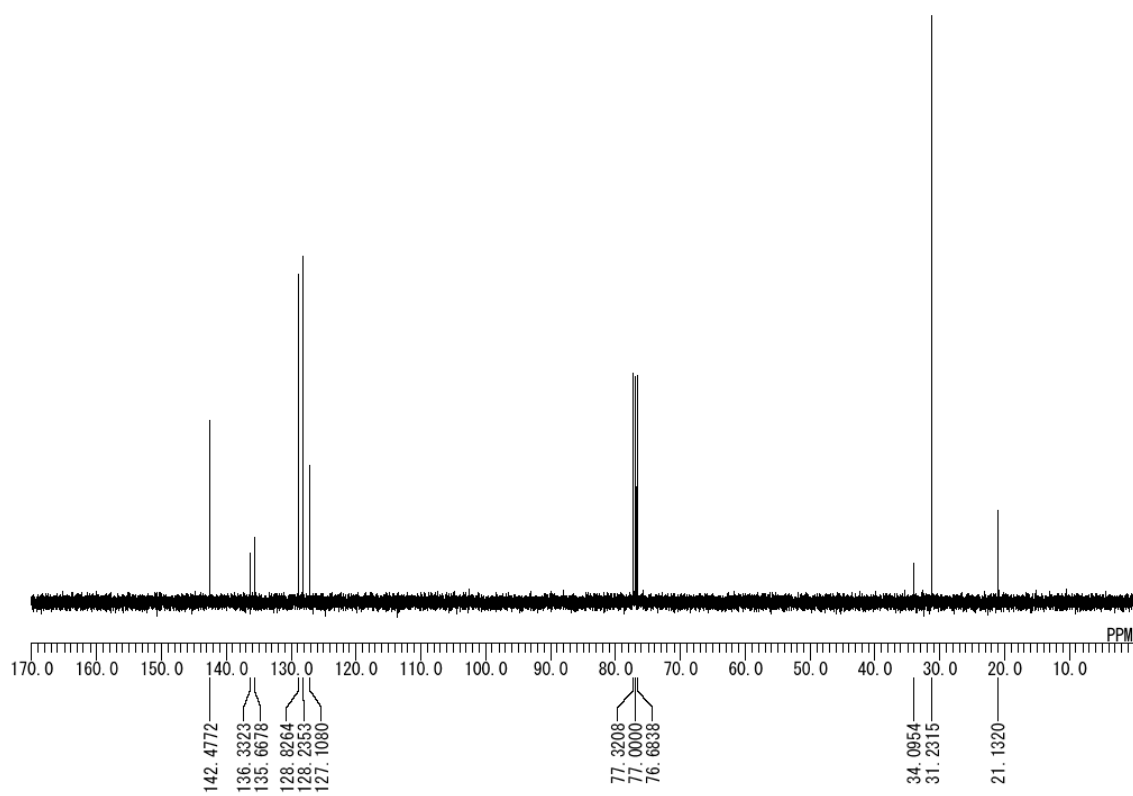

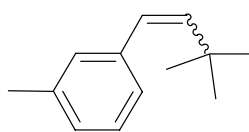

**2c**

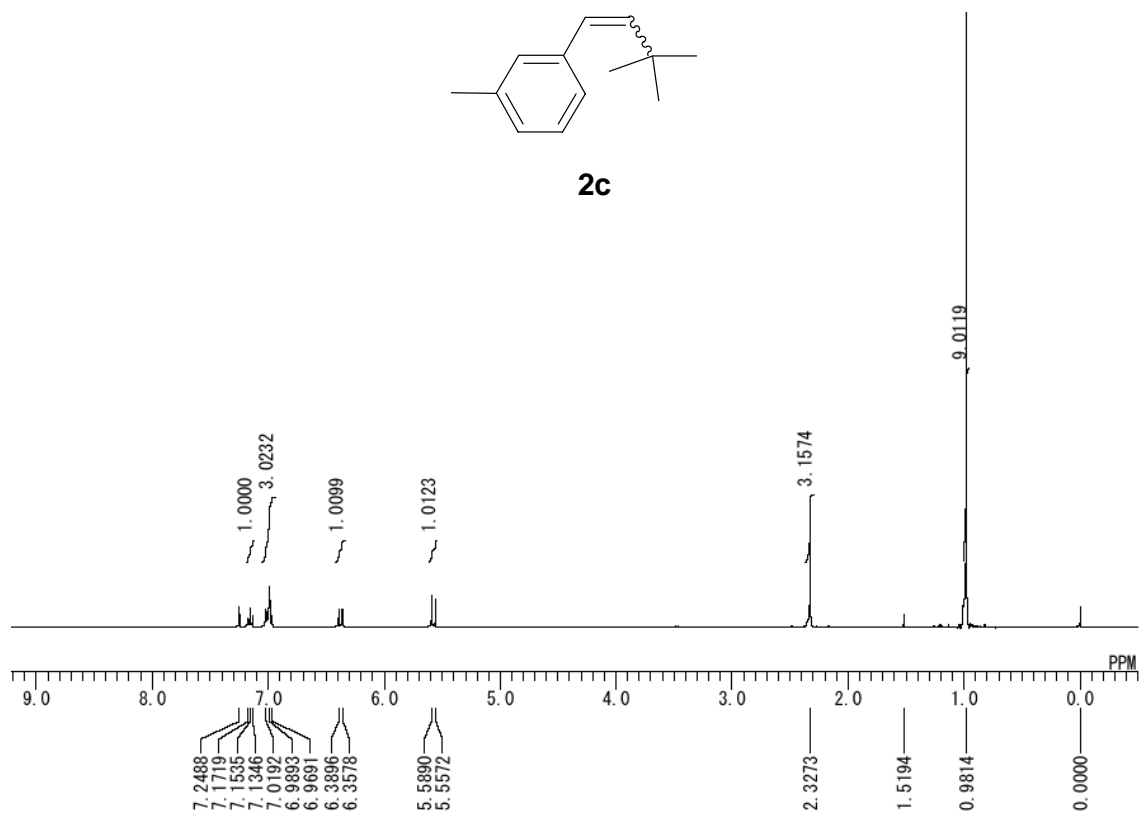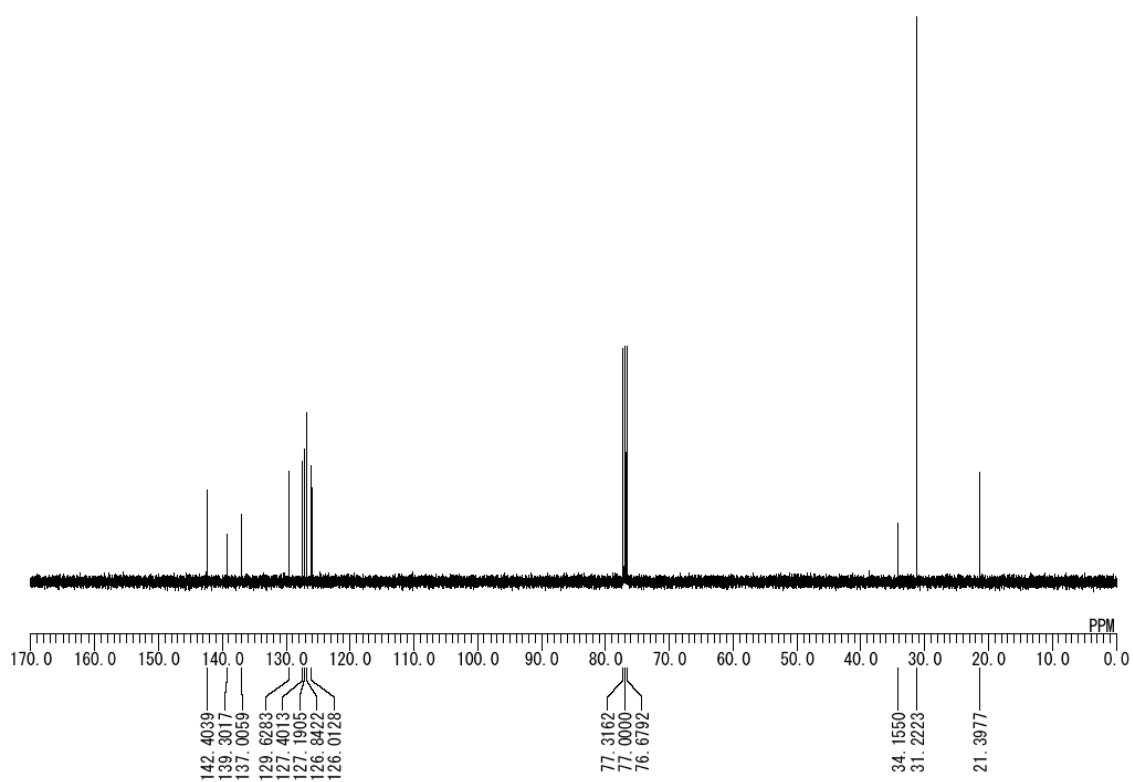

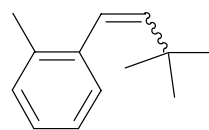

**2d**

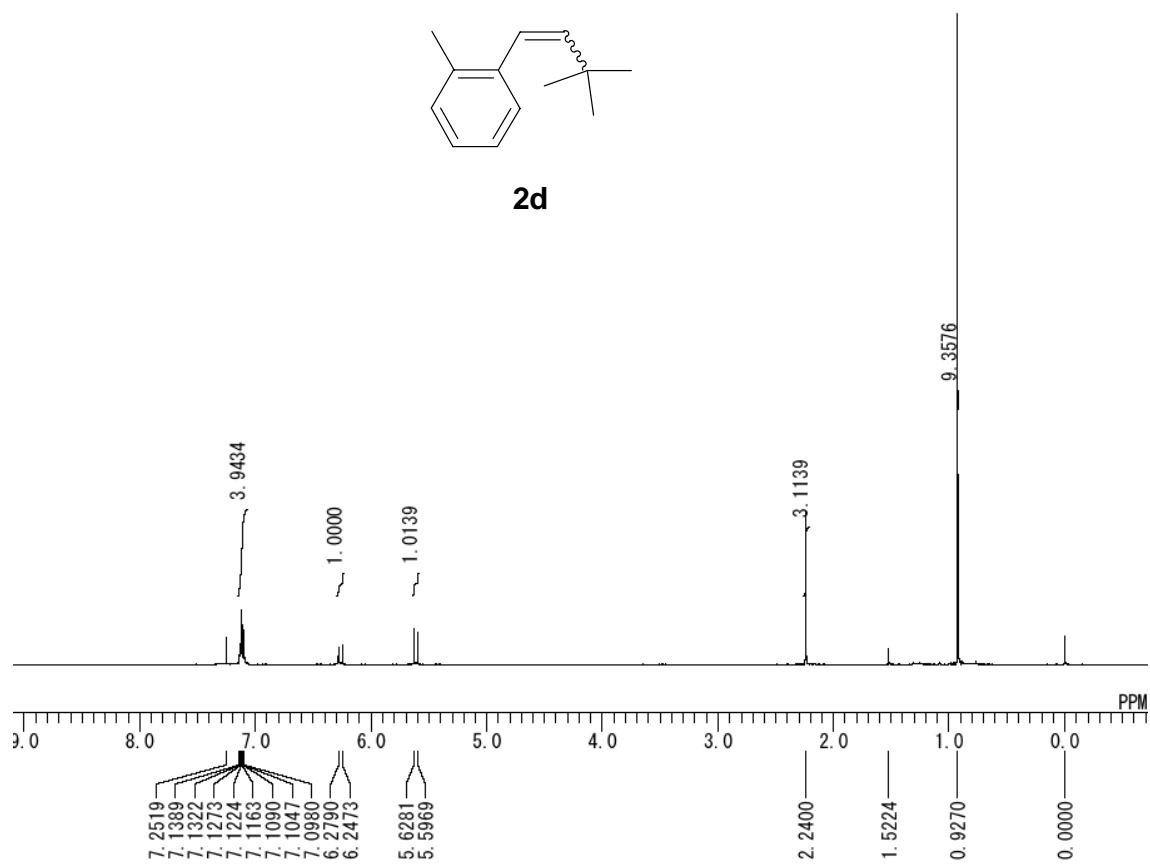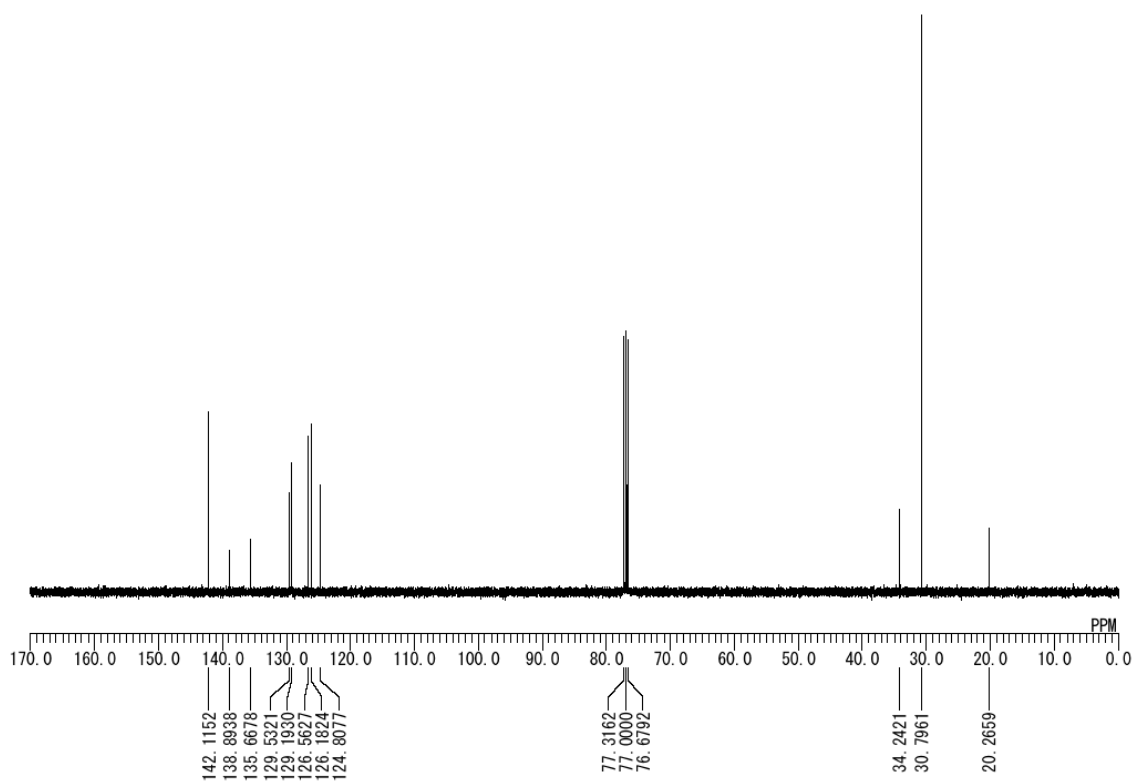



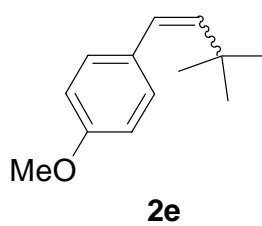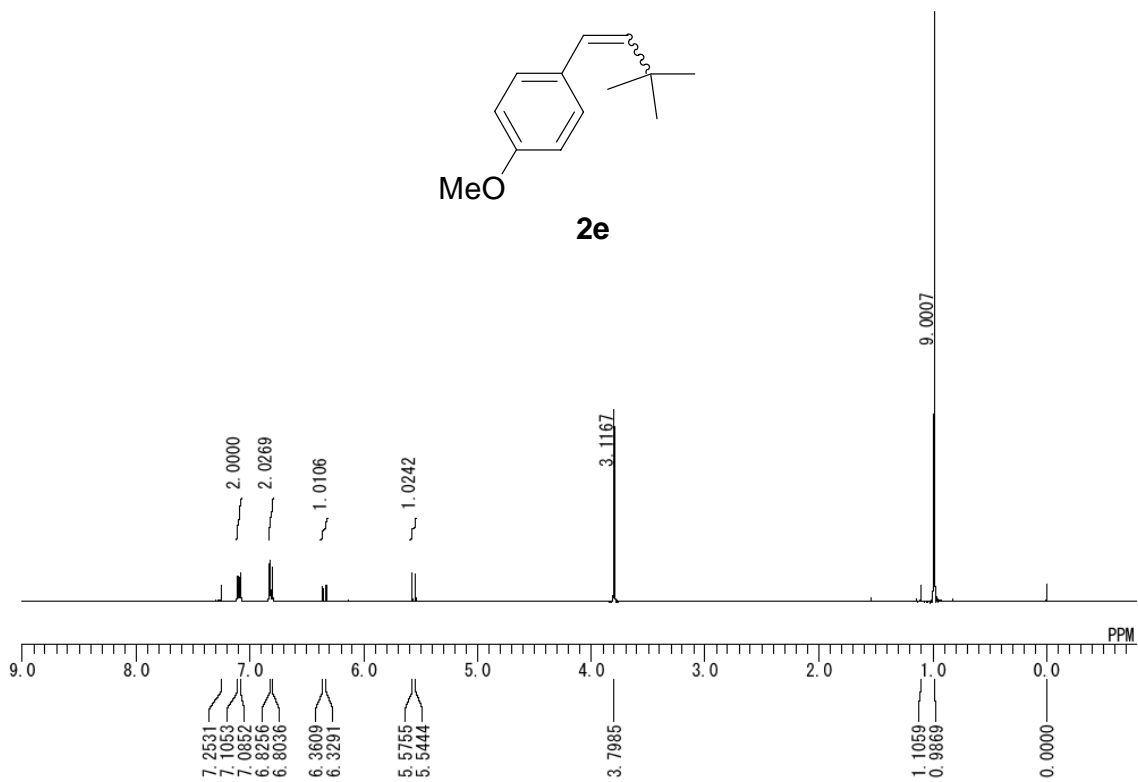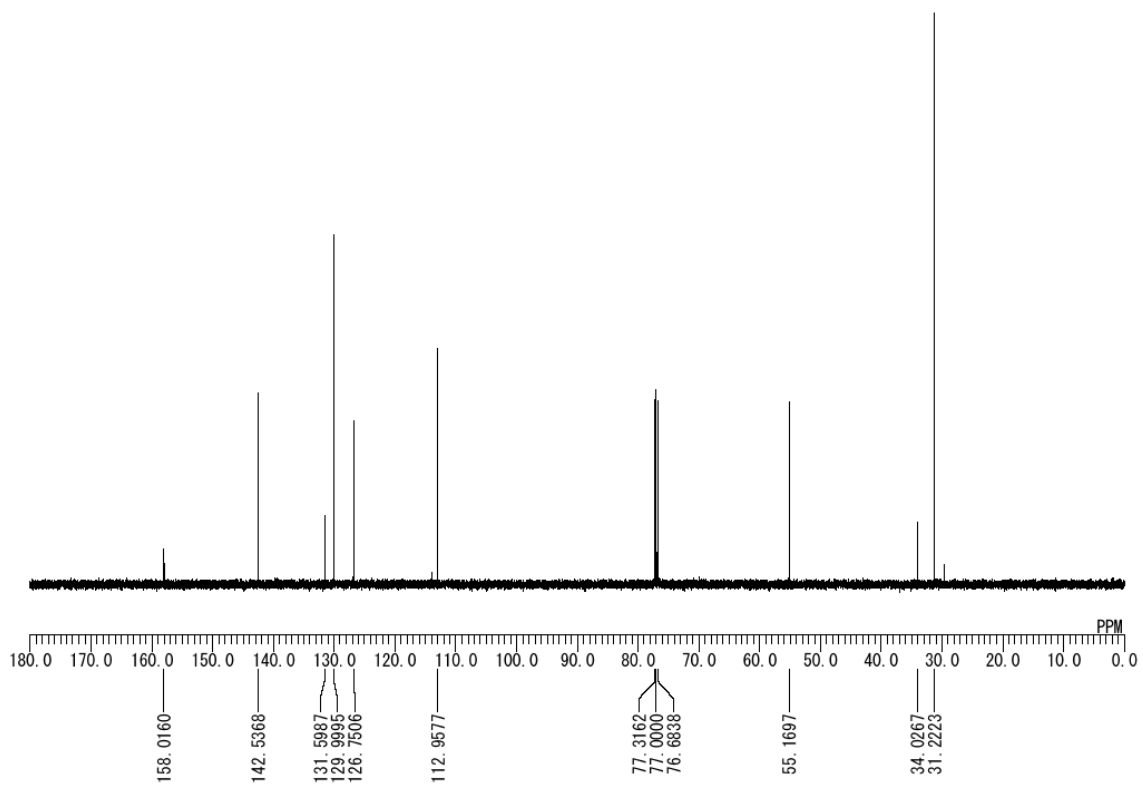

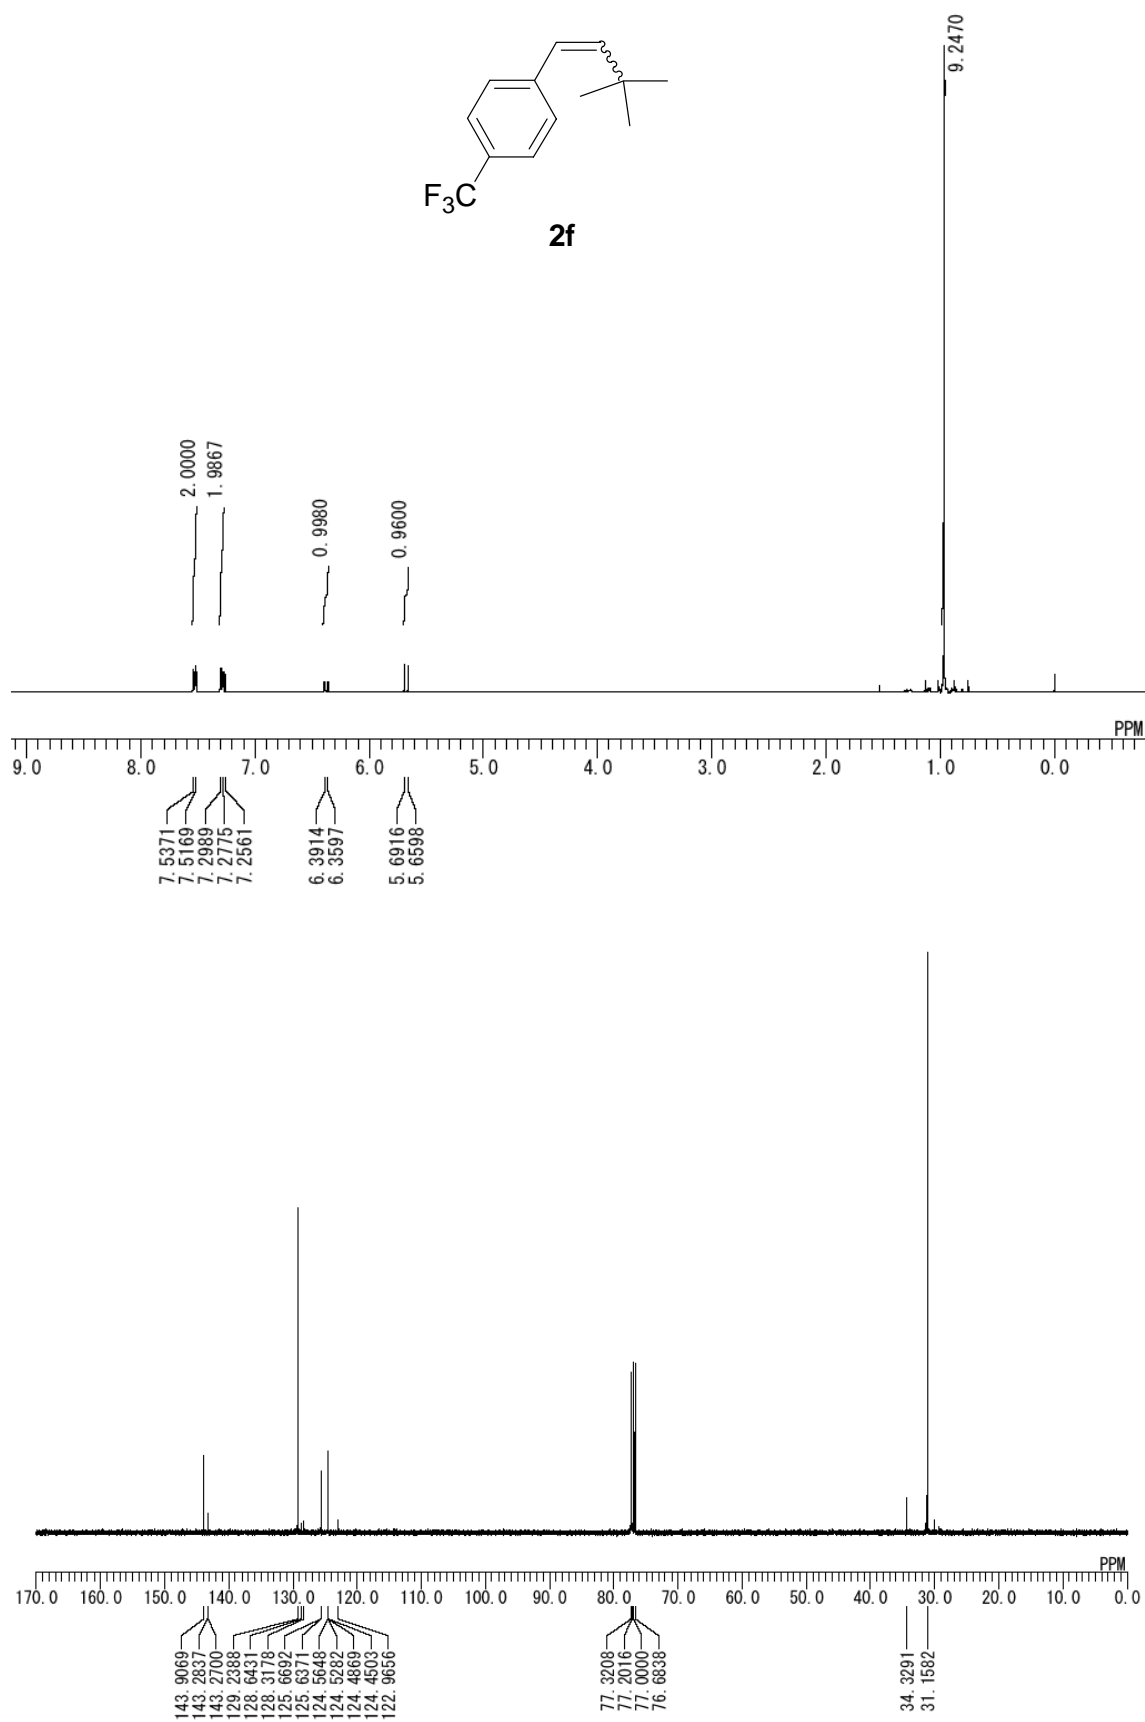

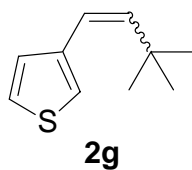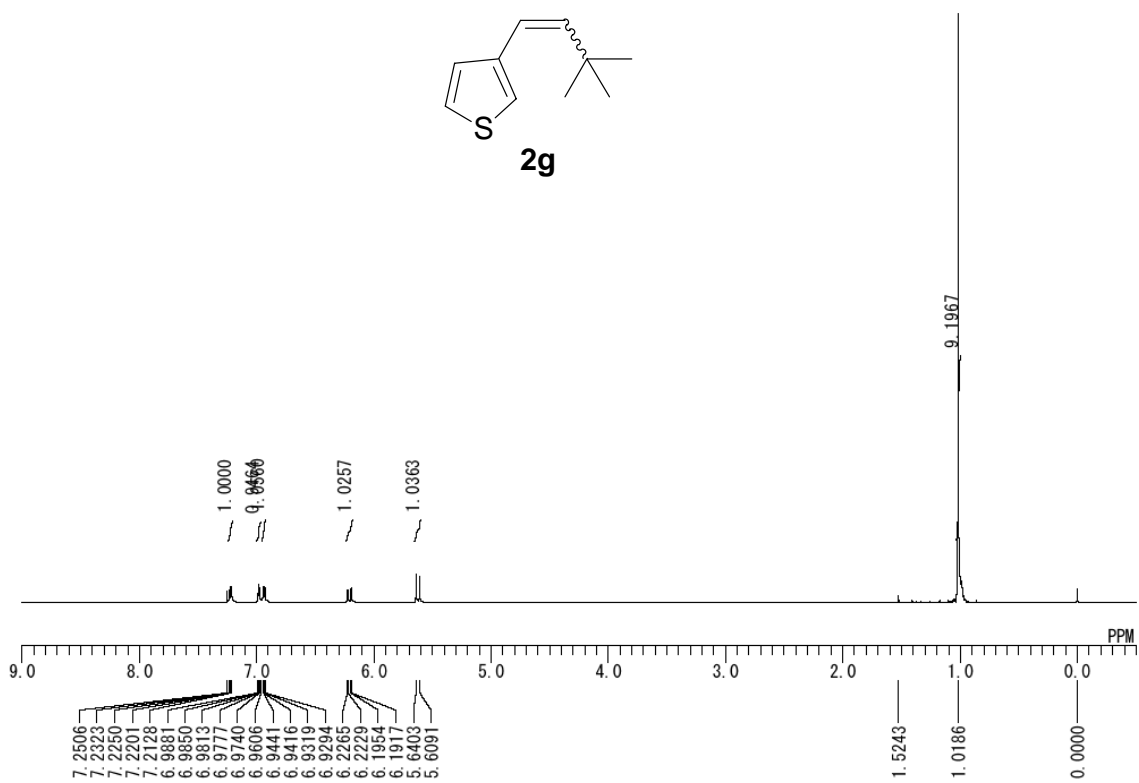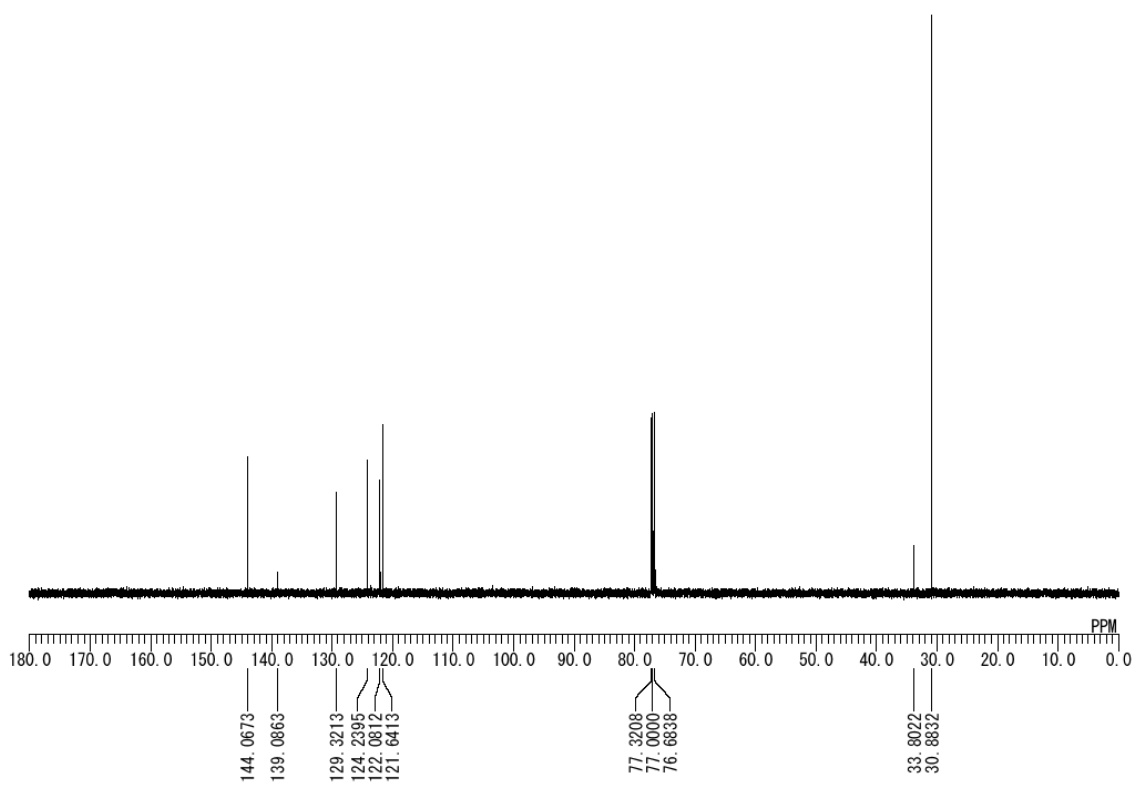

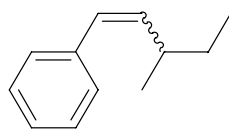

**2h**

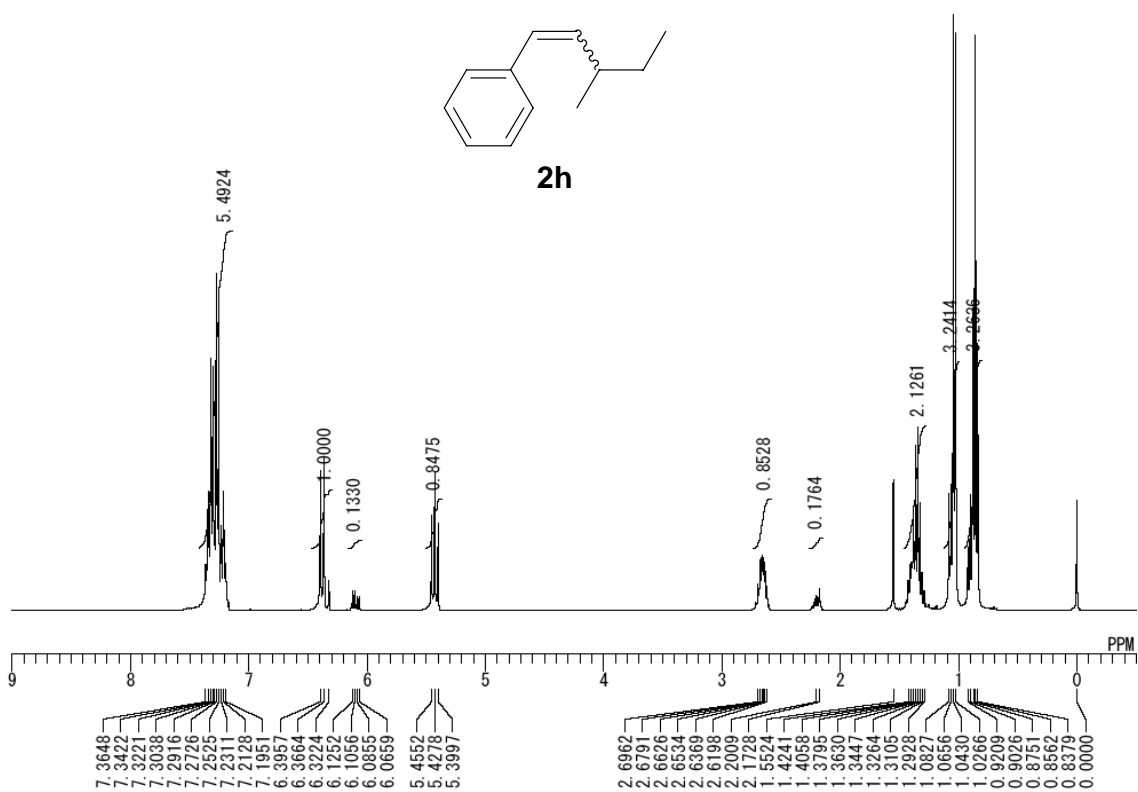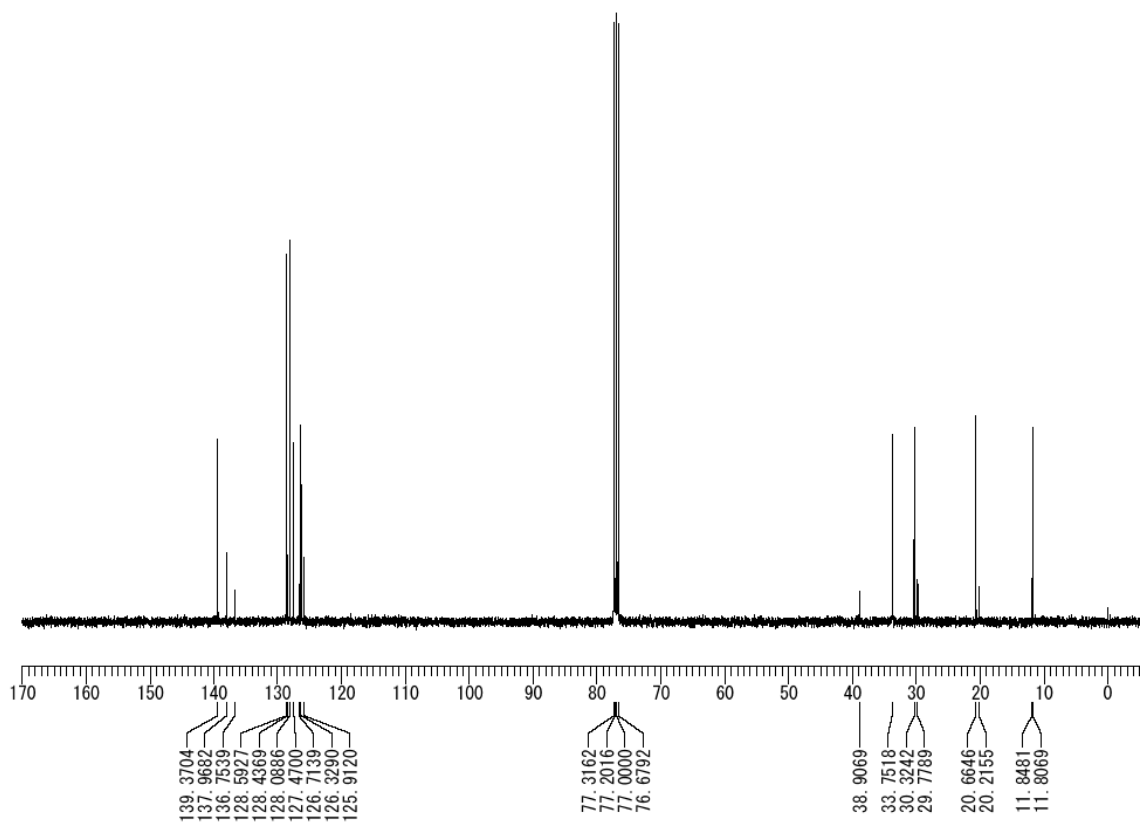

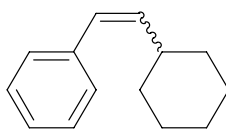

**2i**

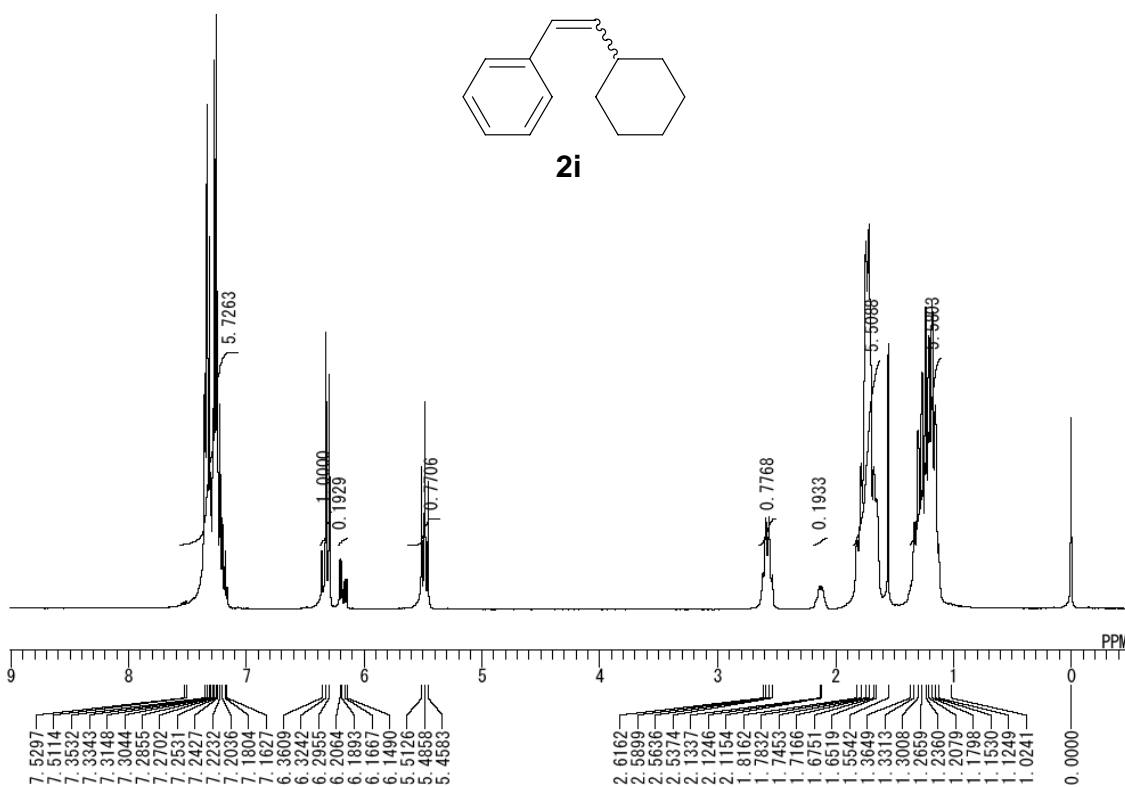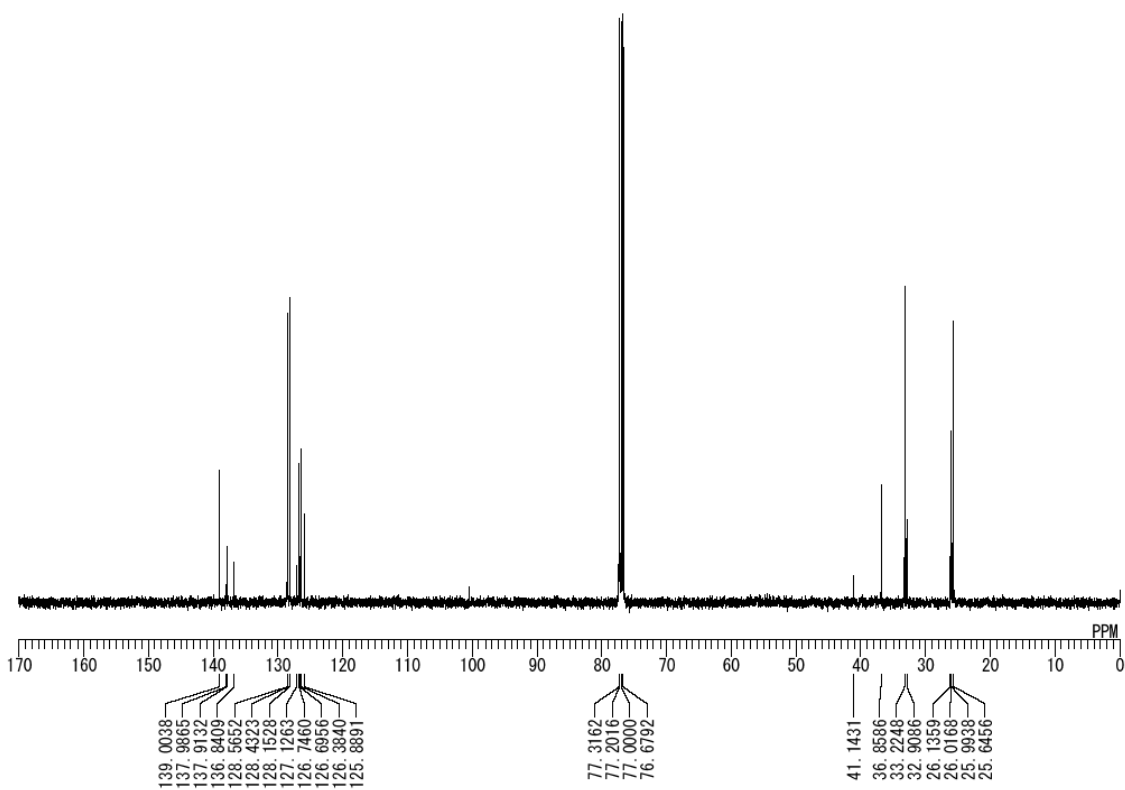

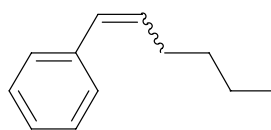

2j

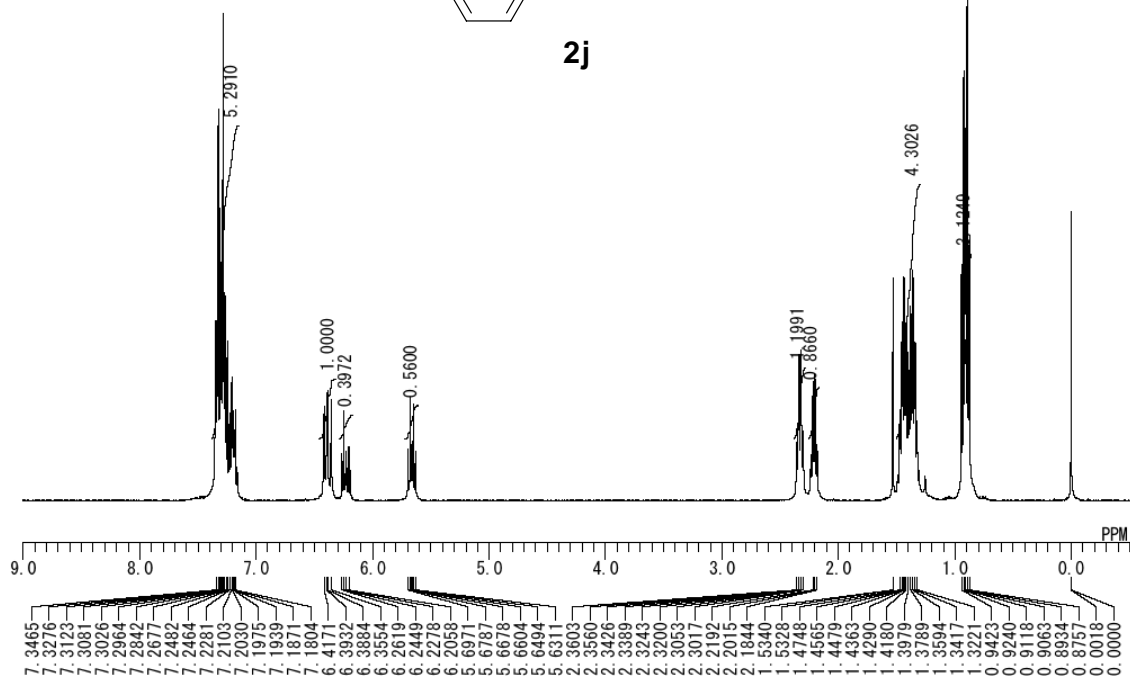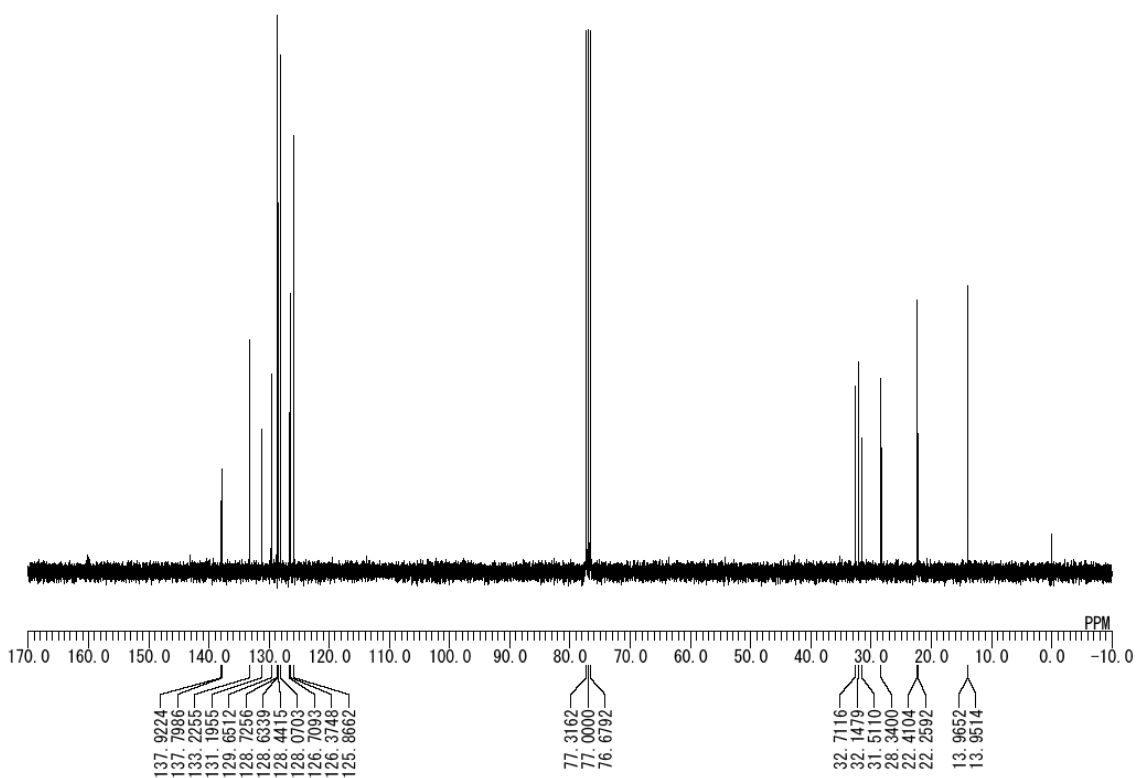

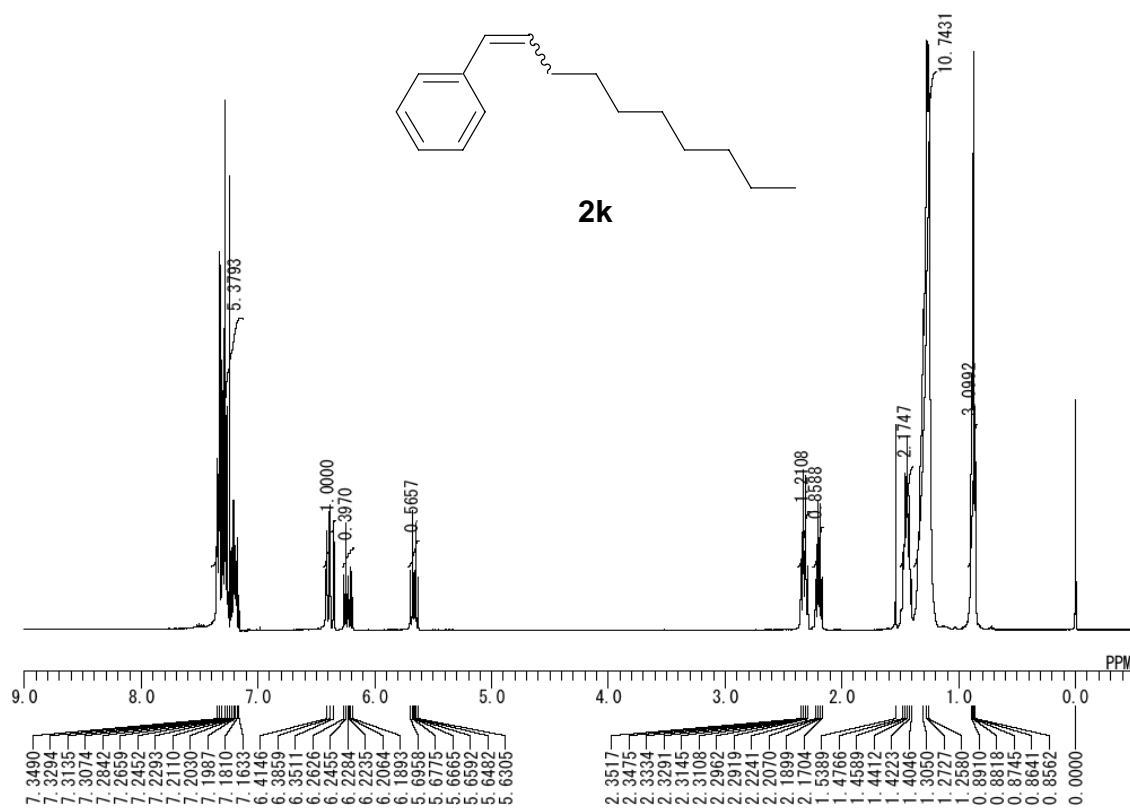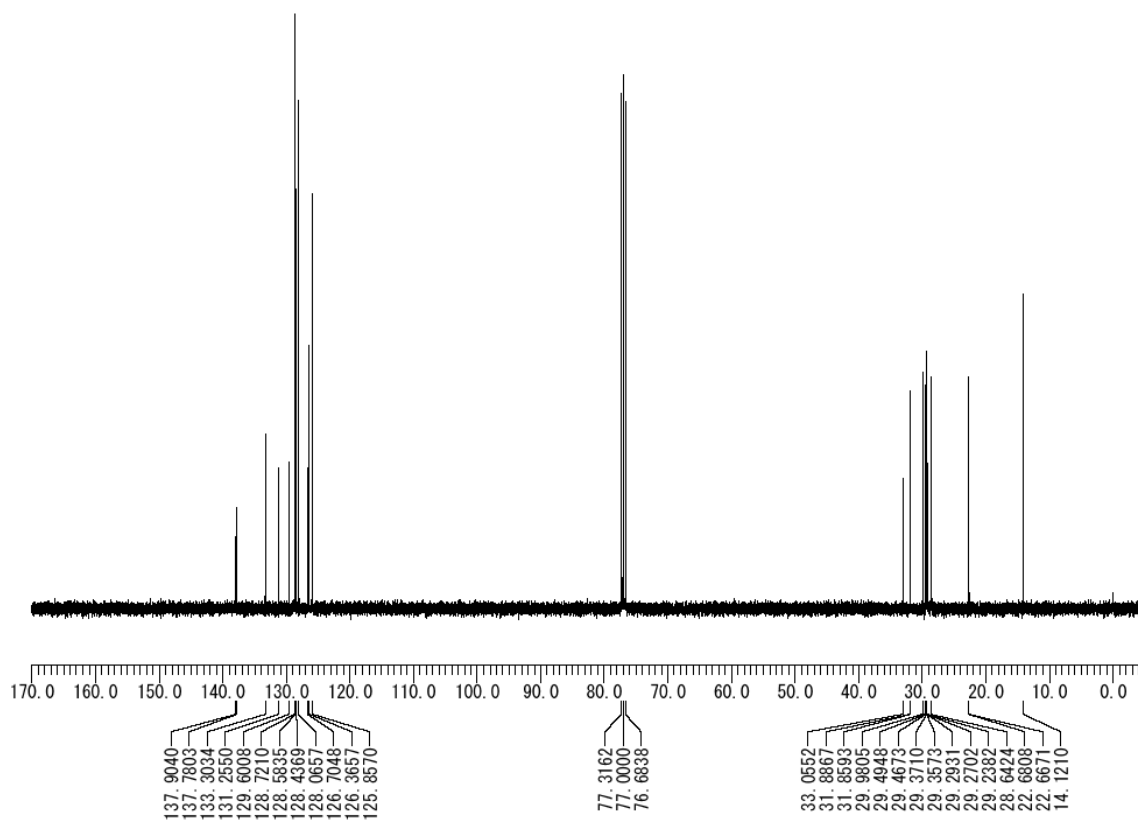

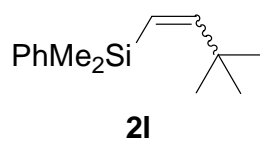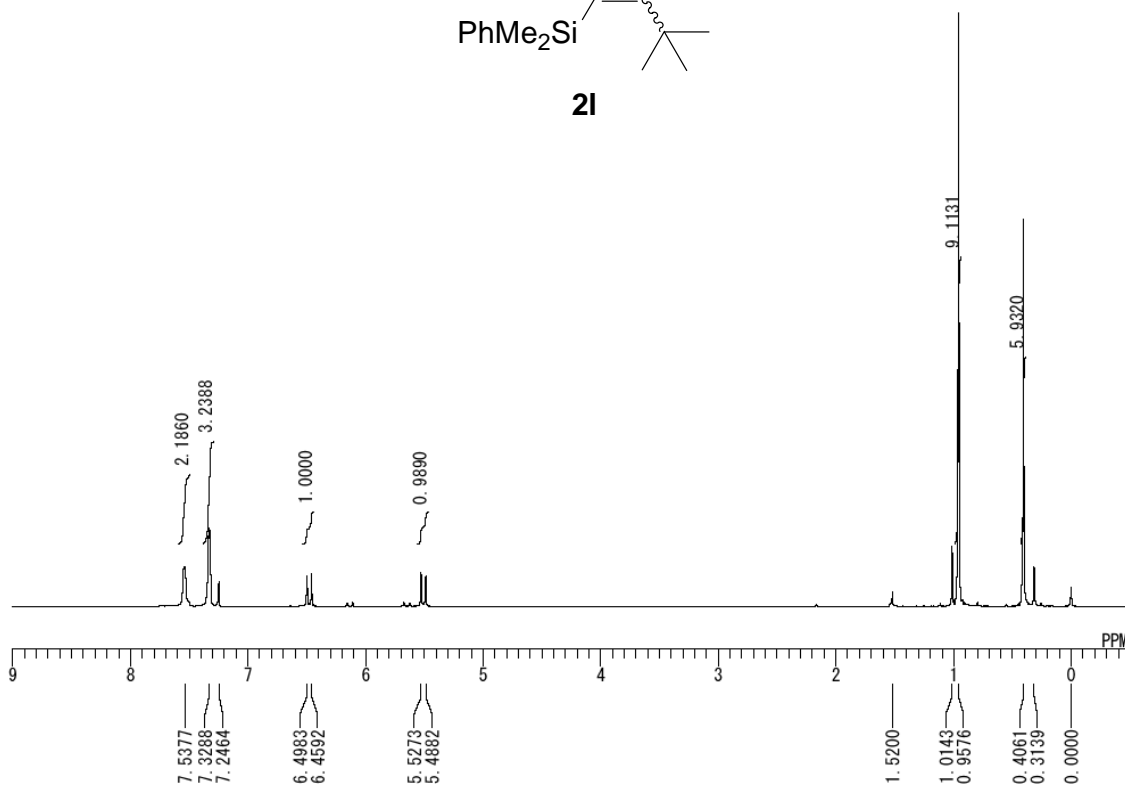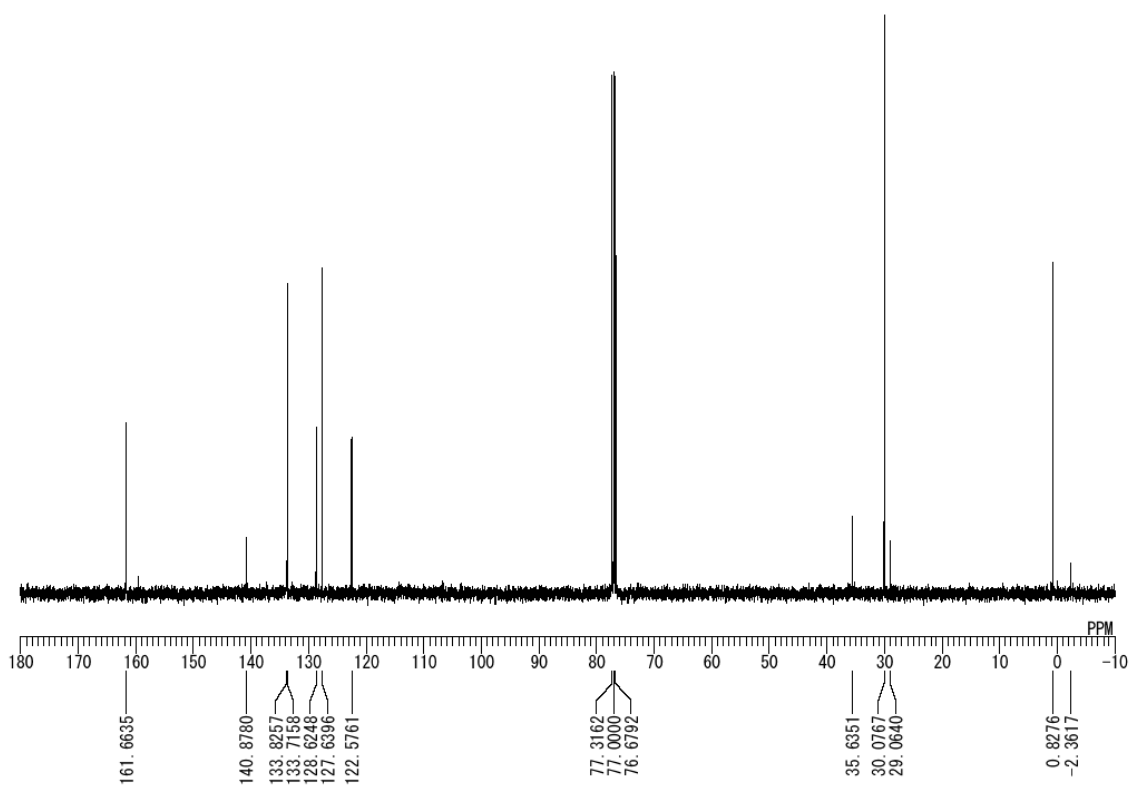



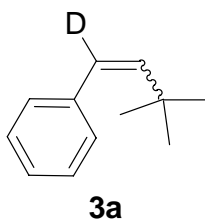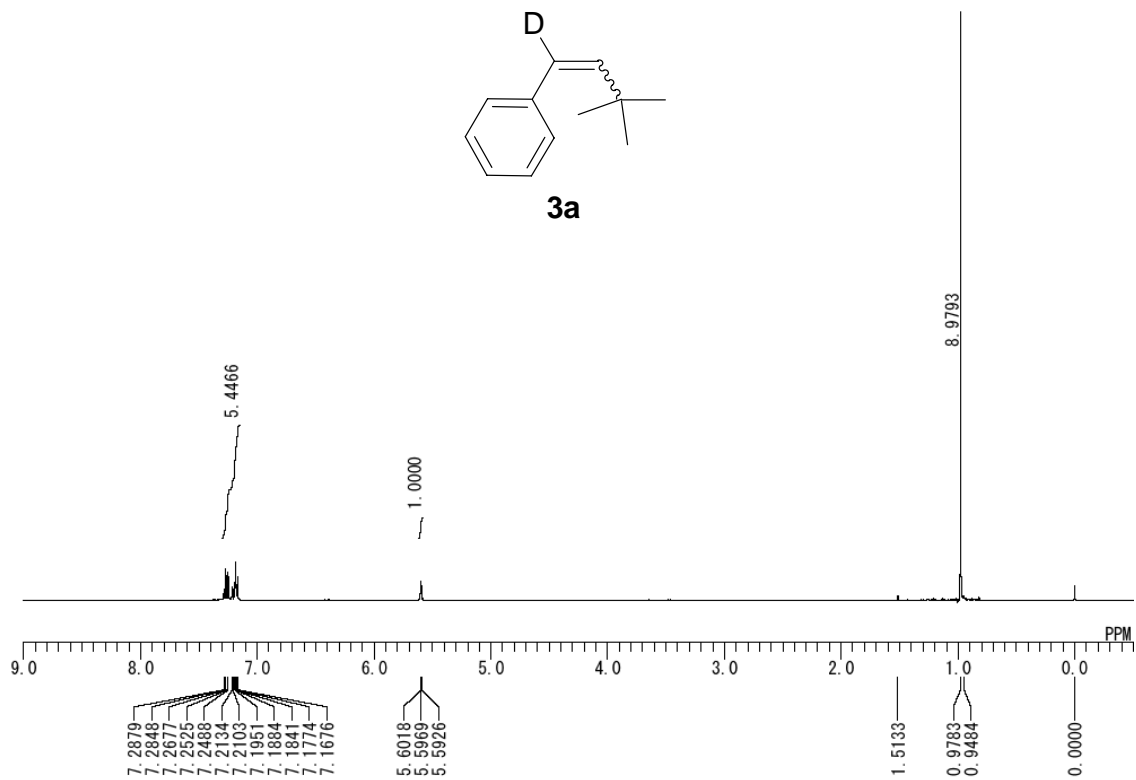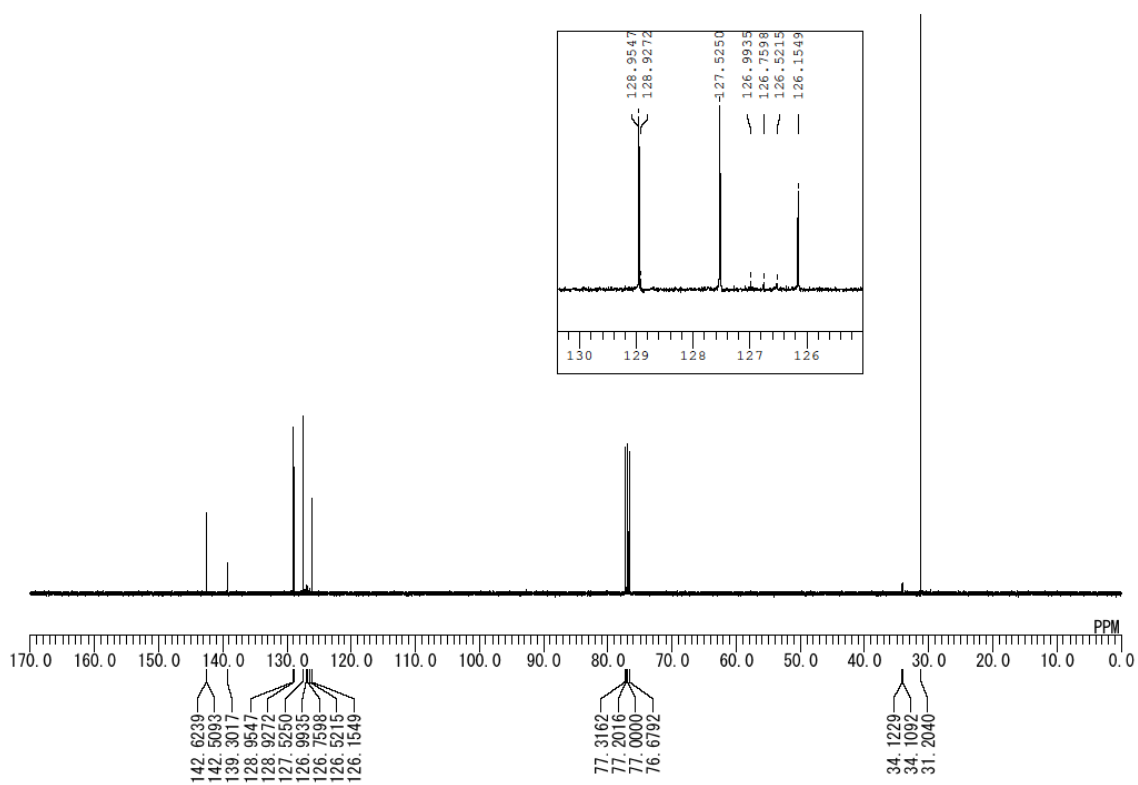

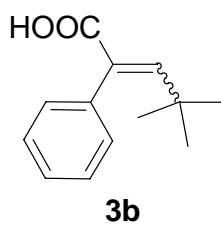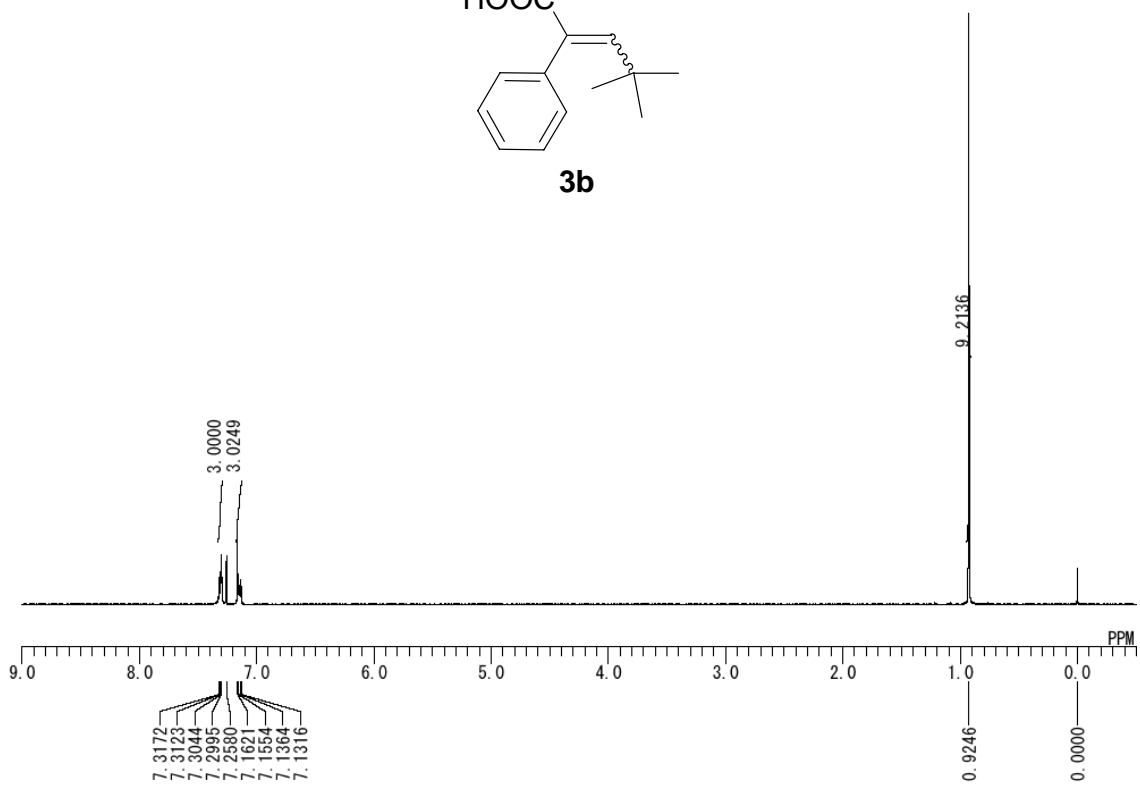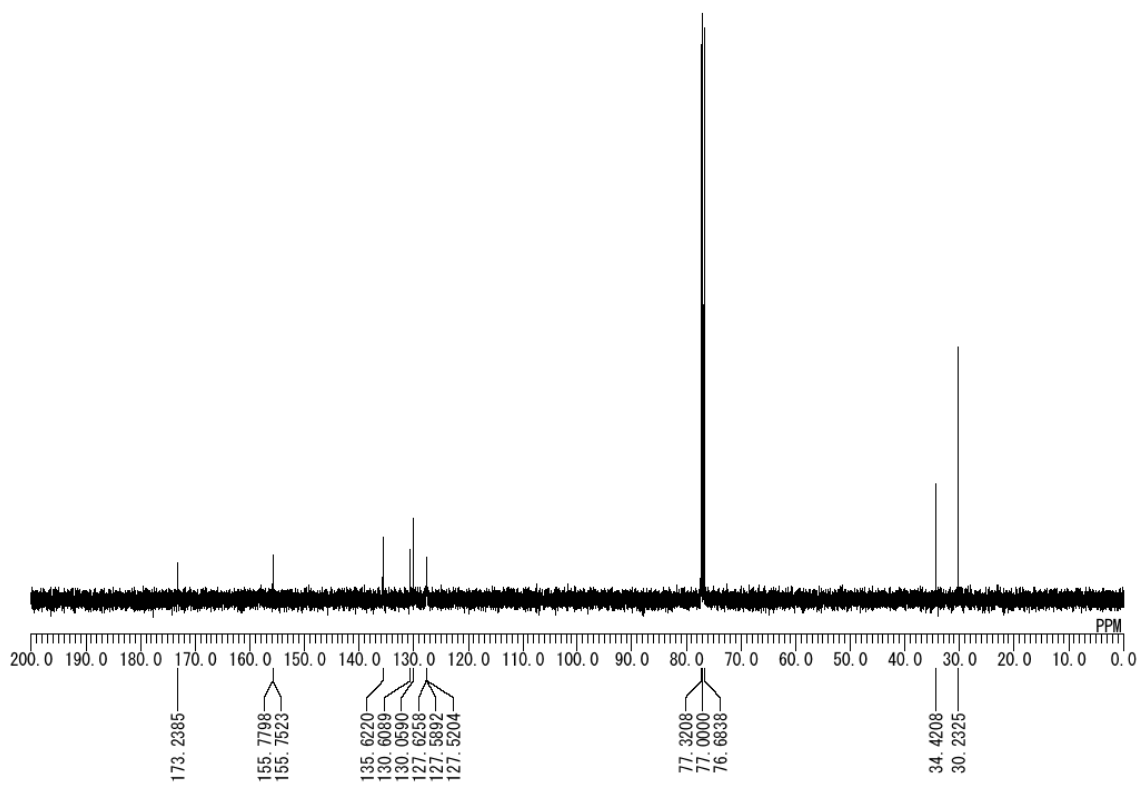

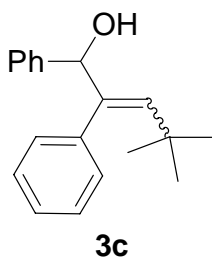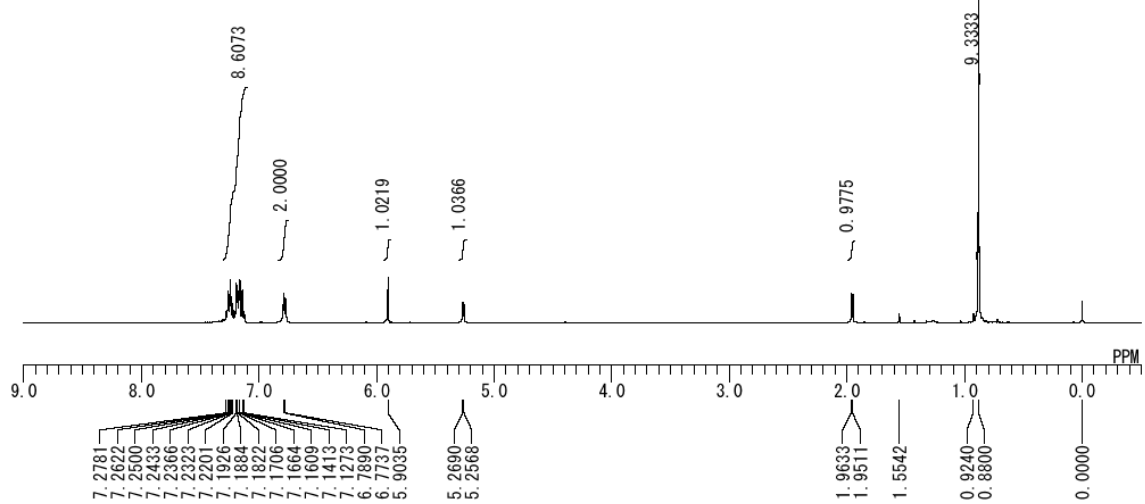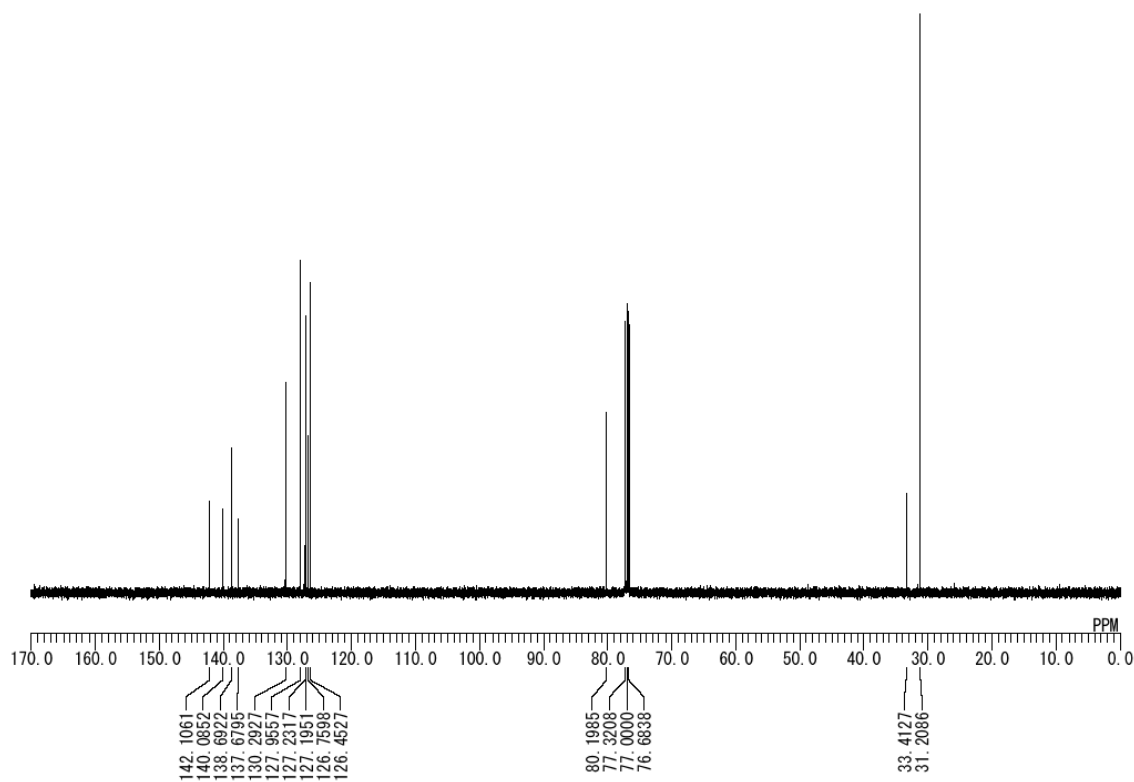

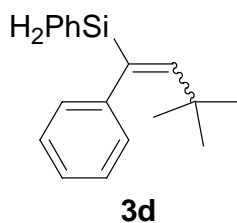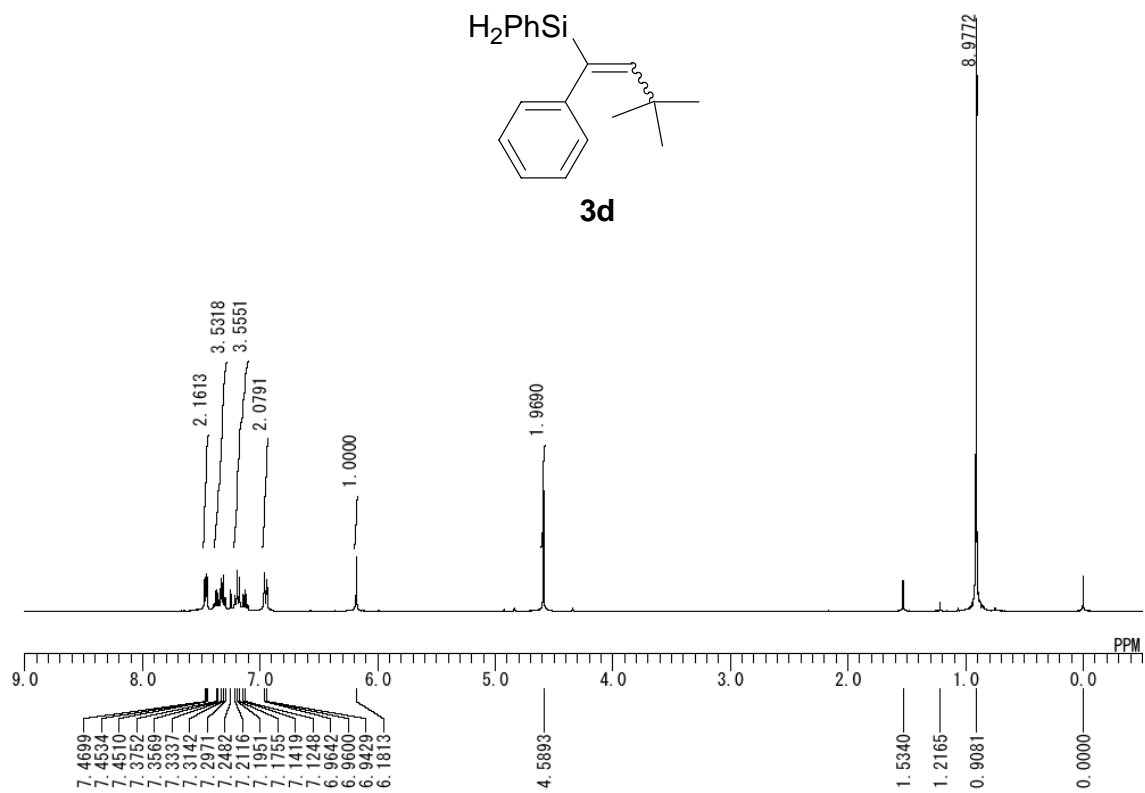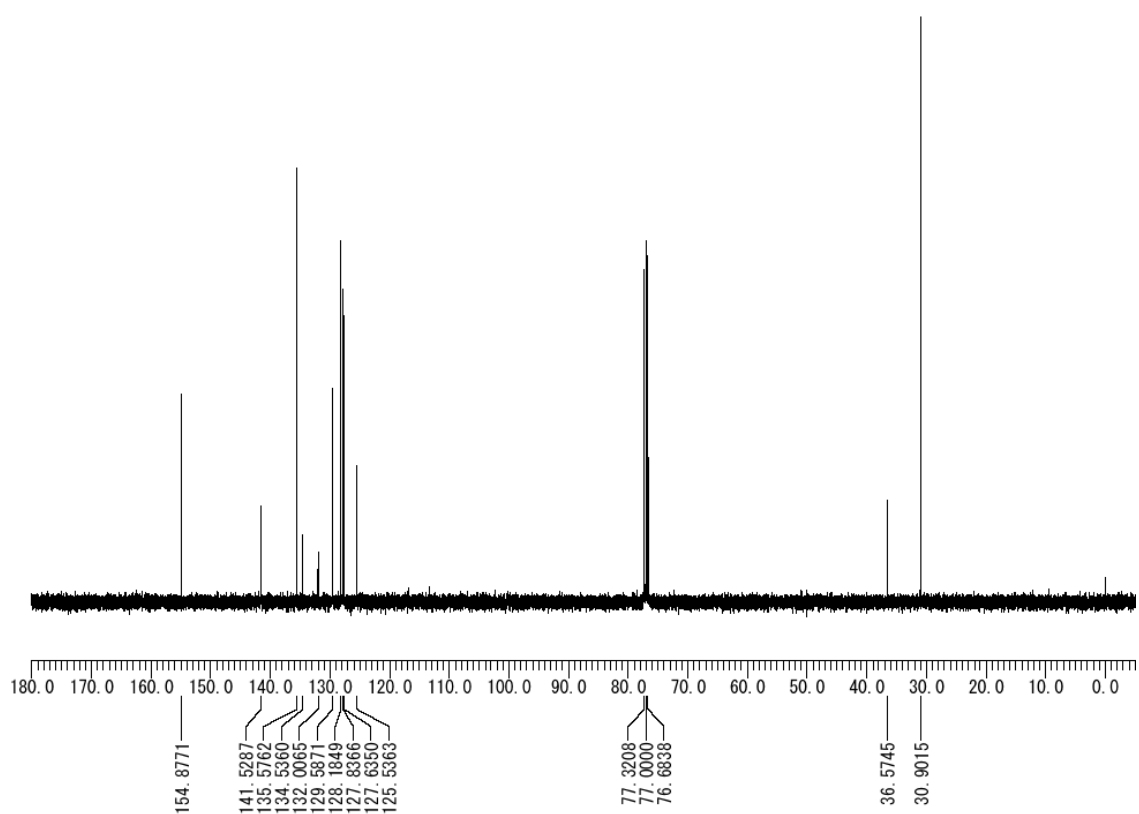

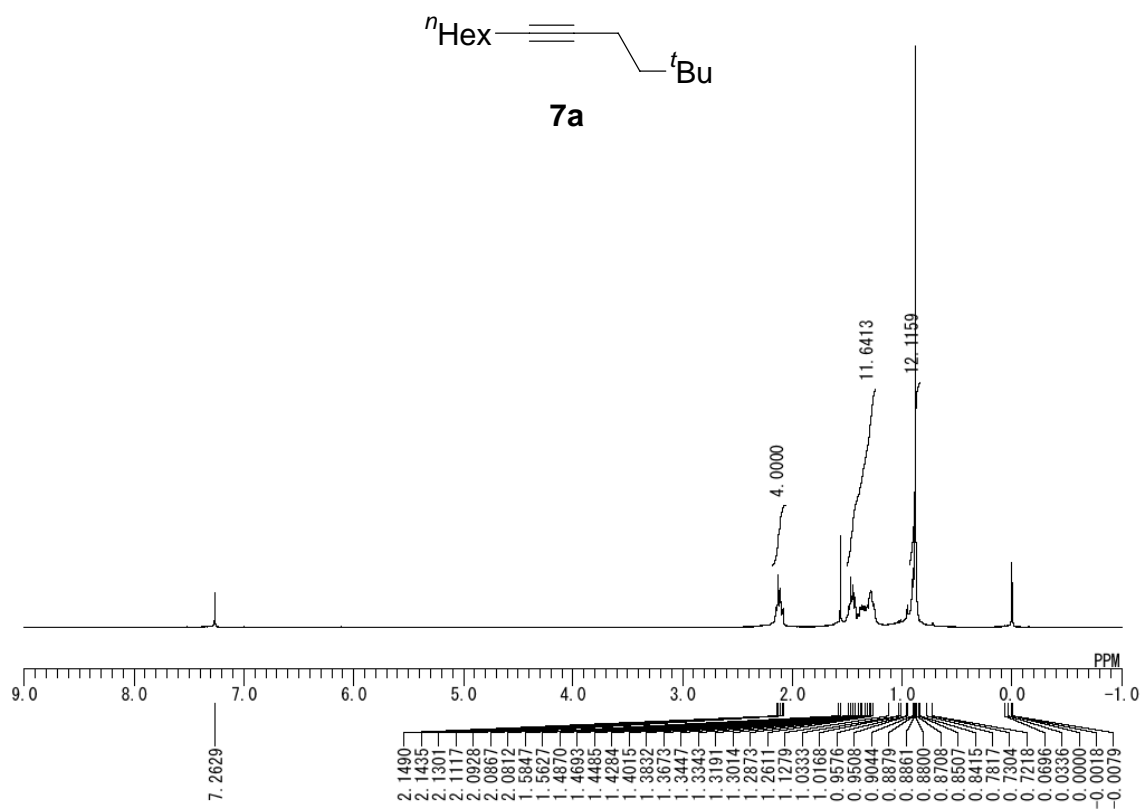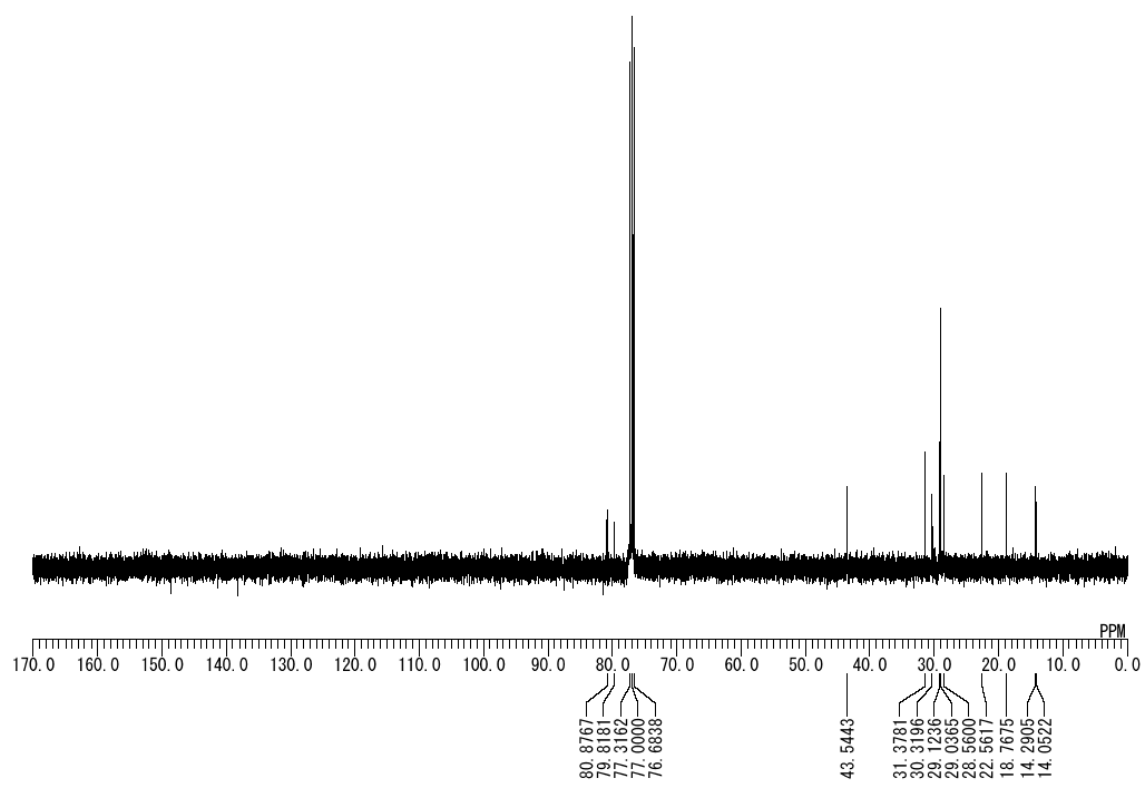

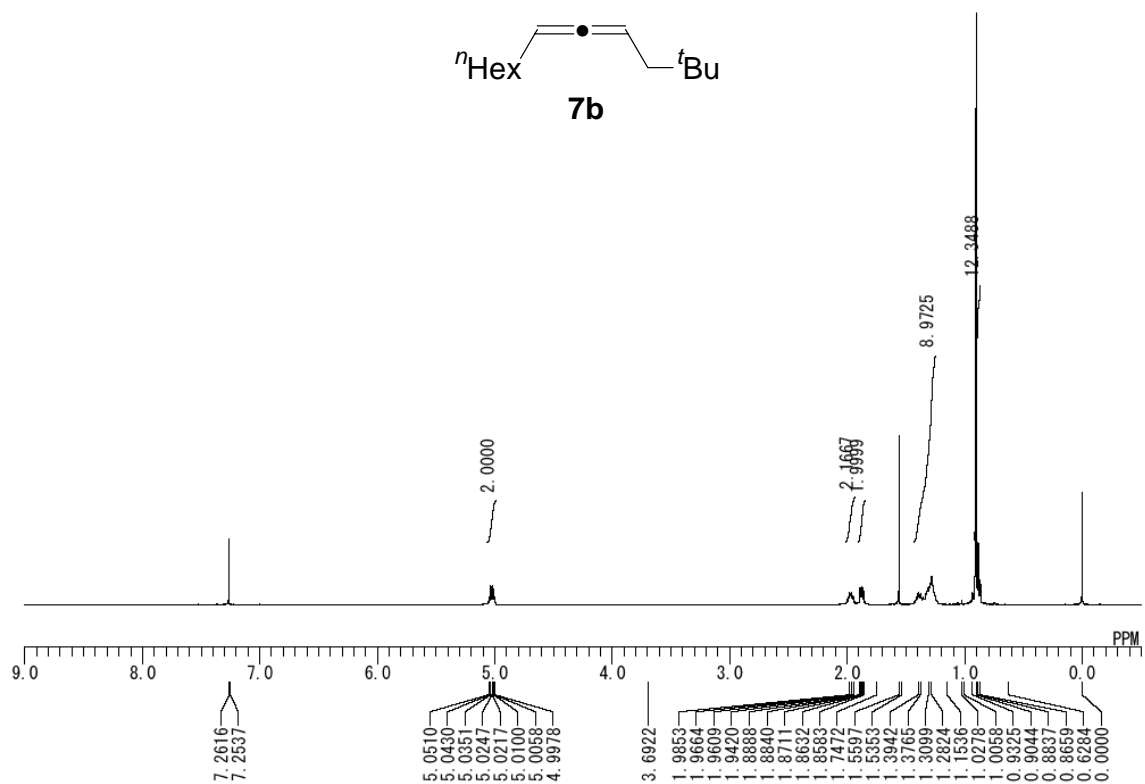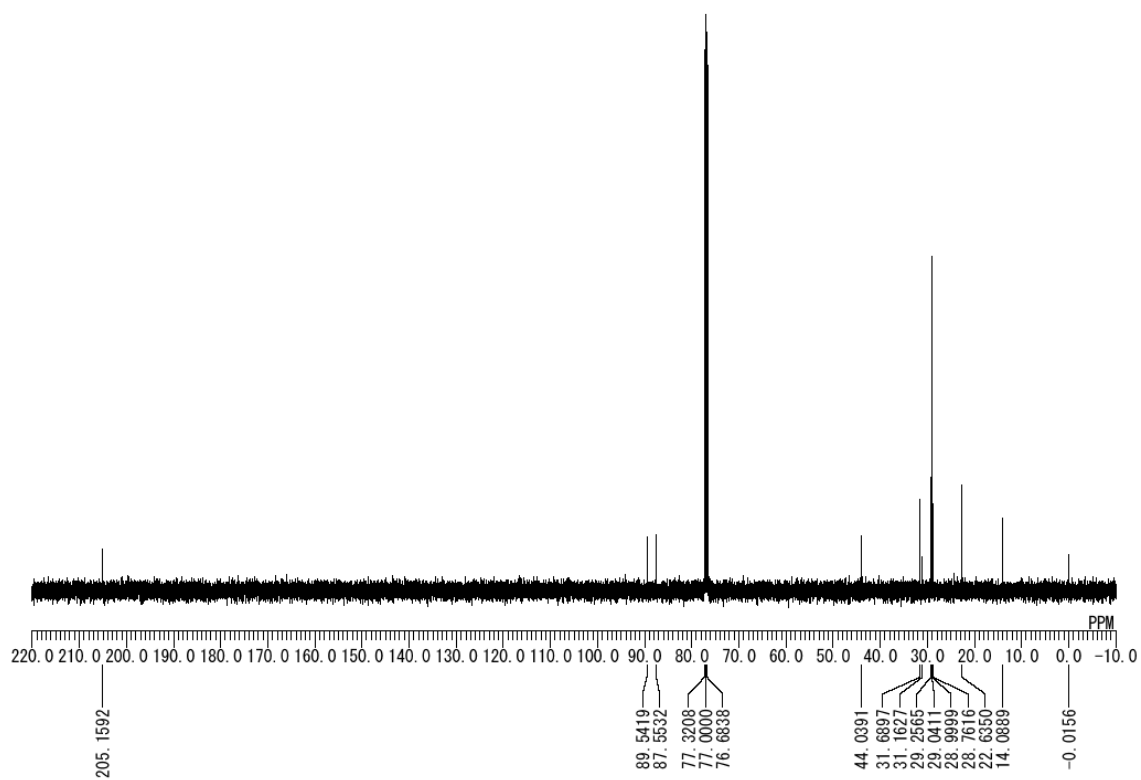

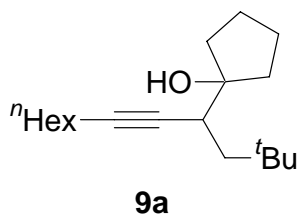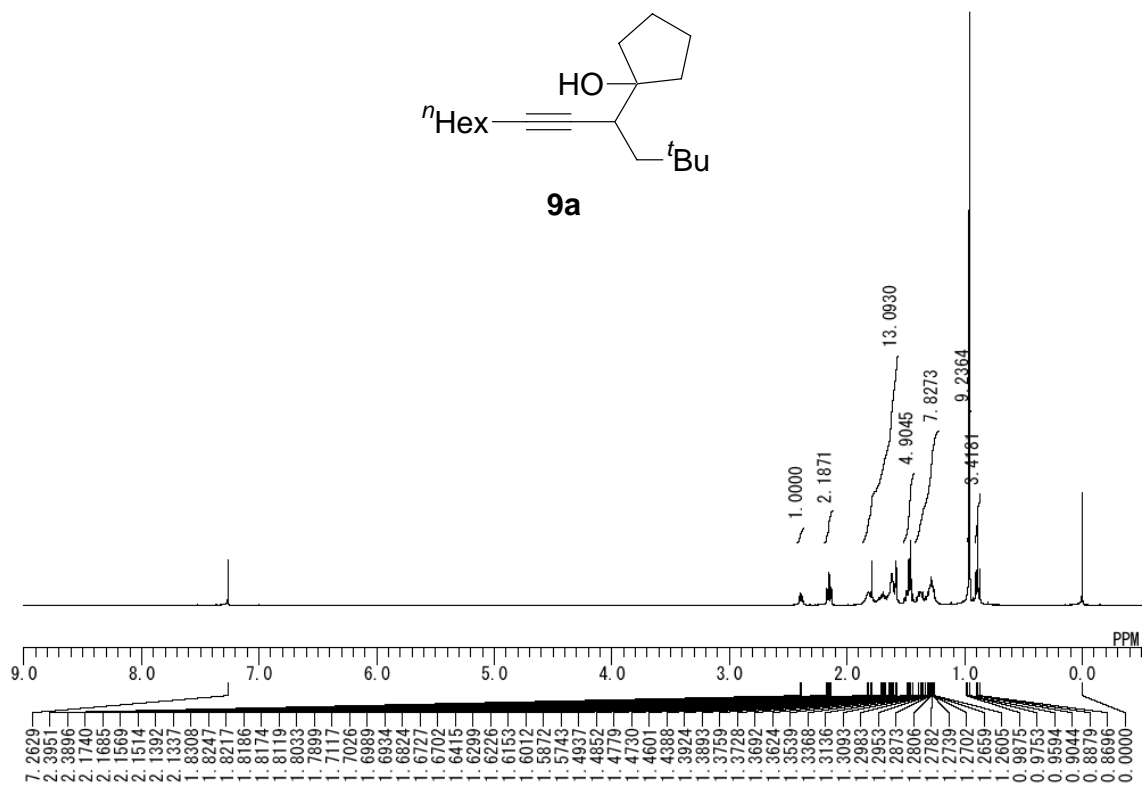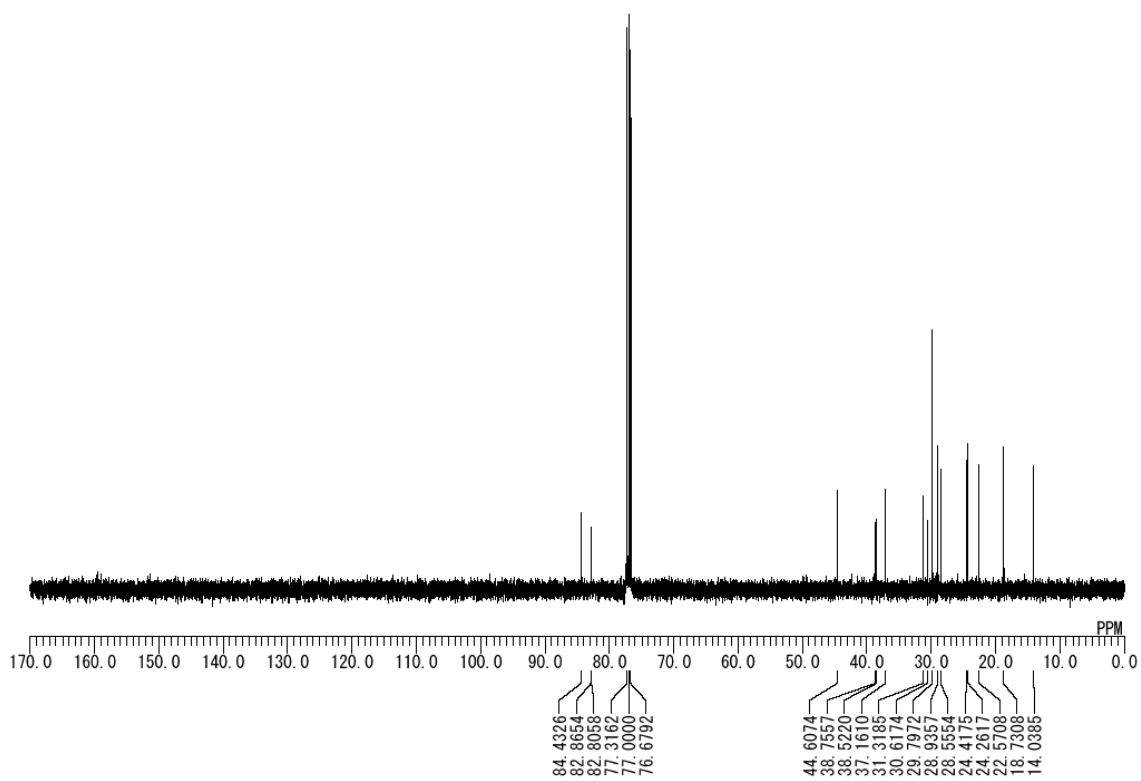

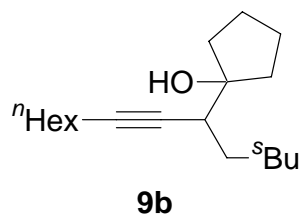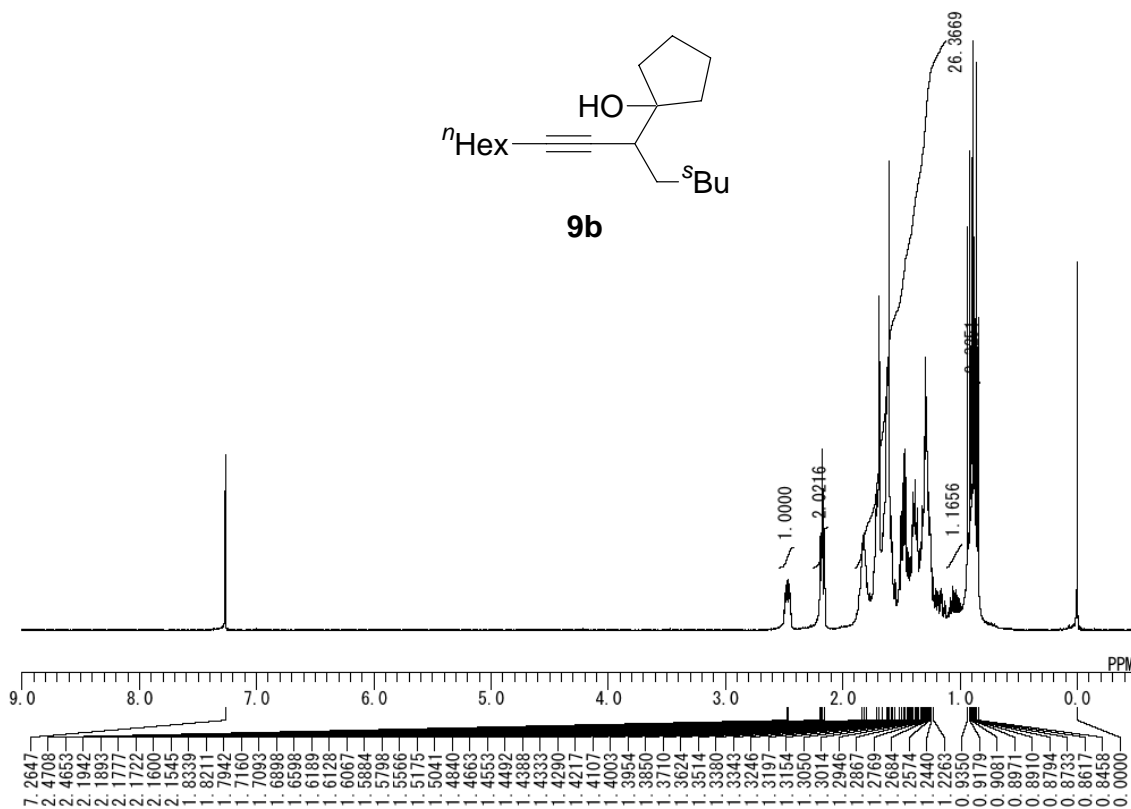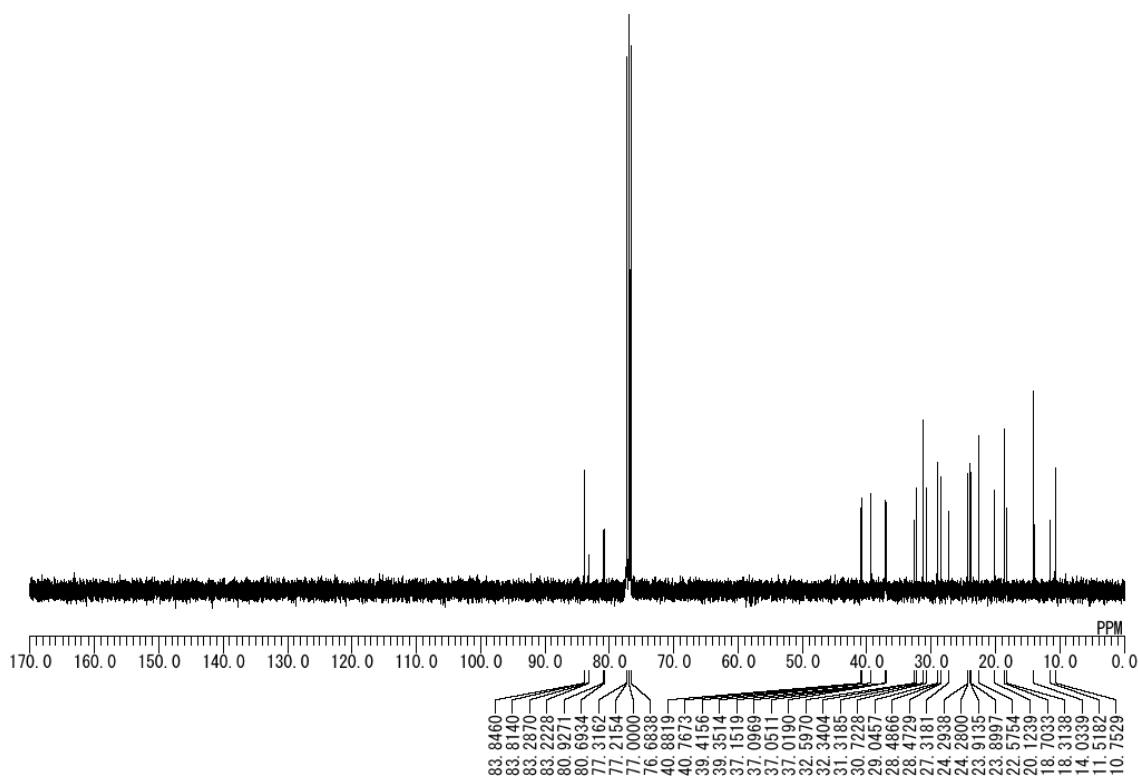



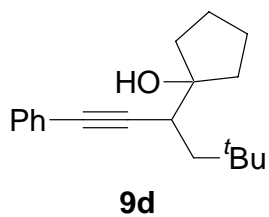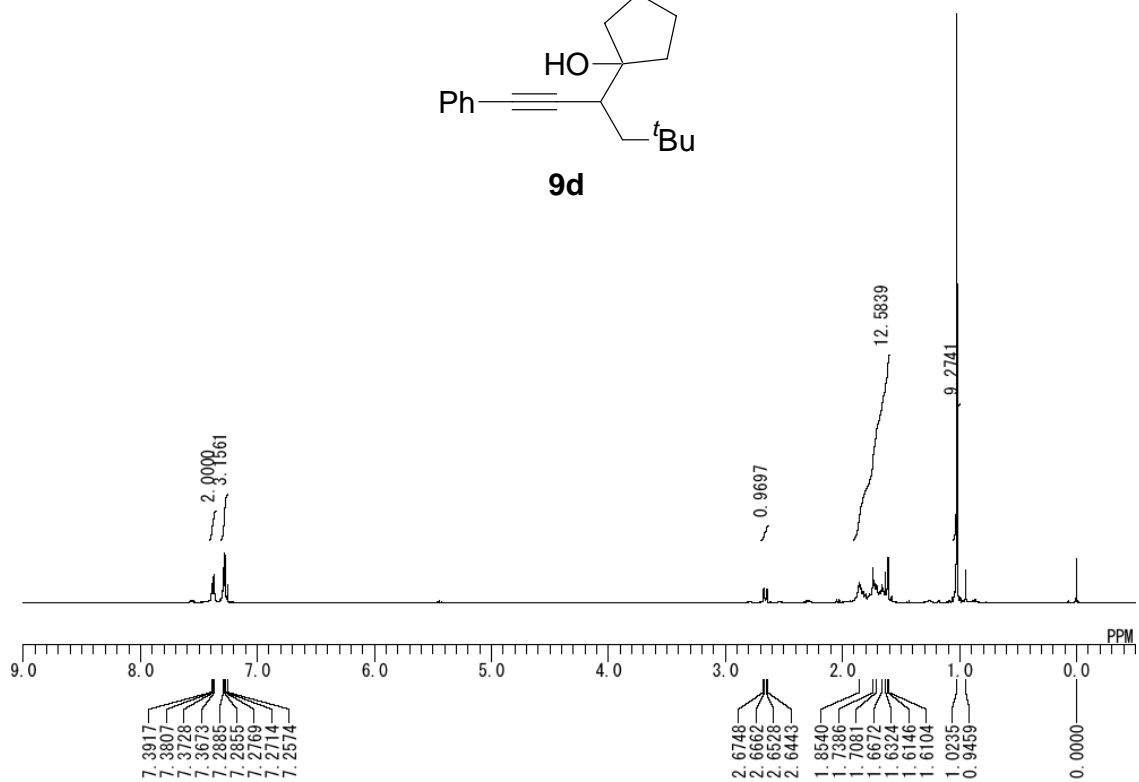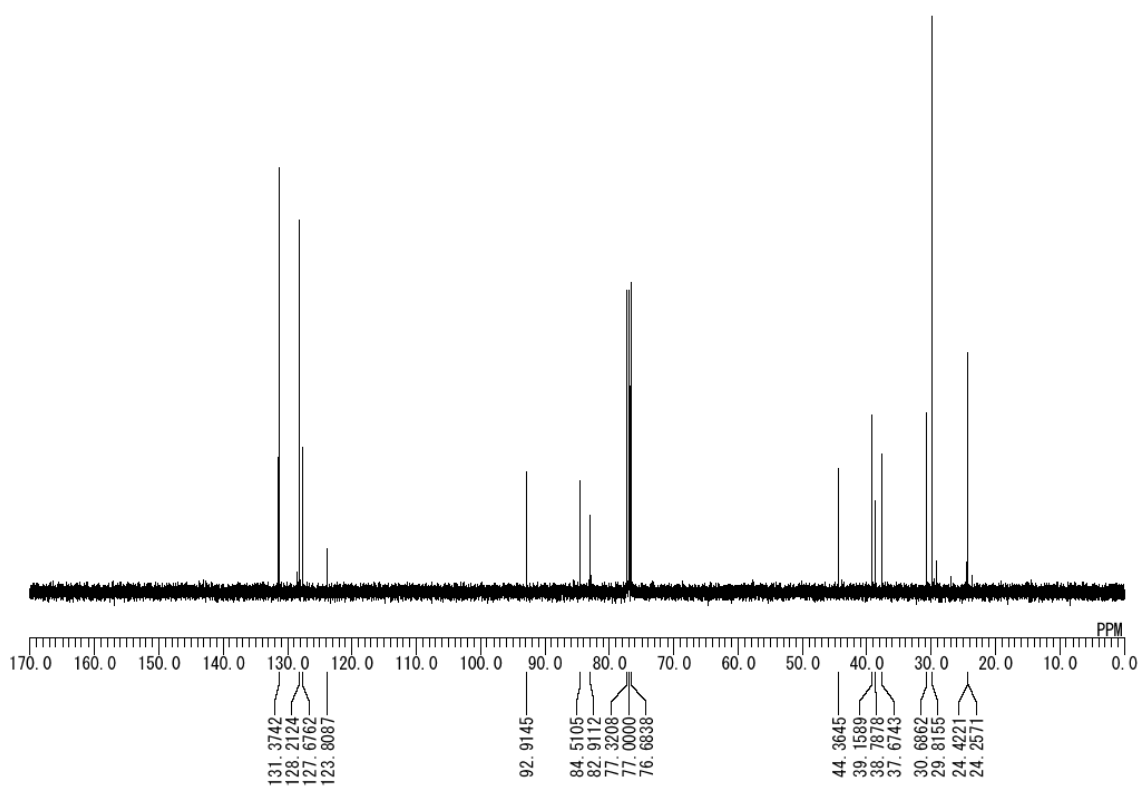

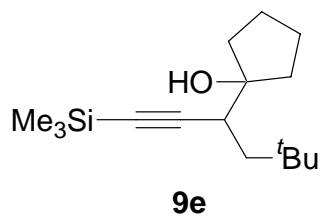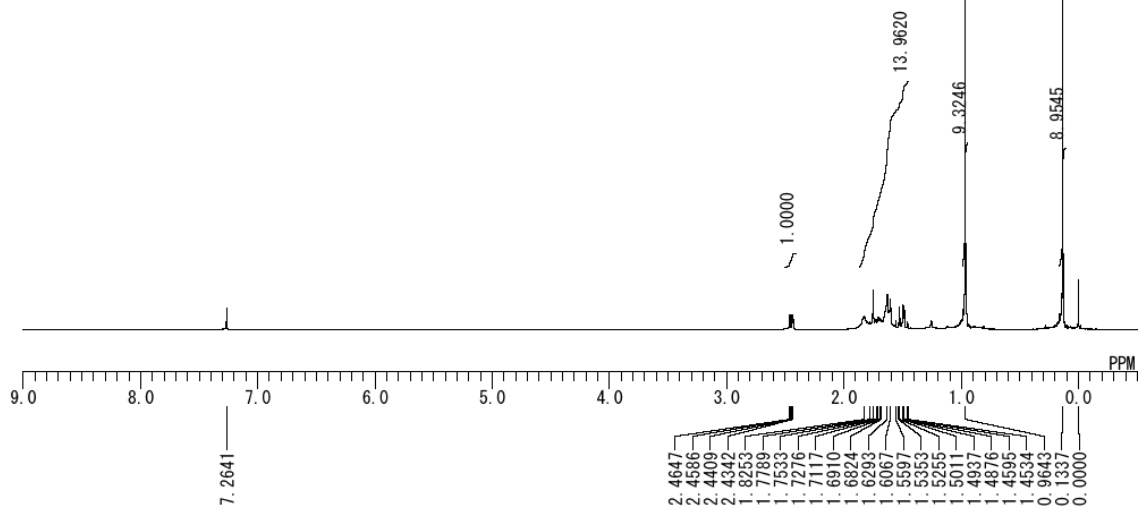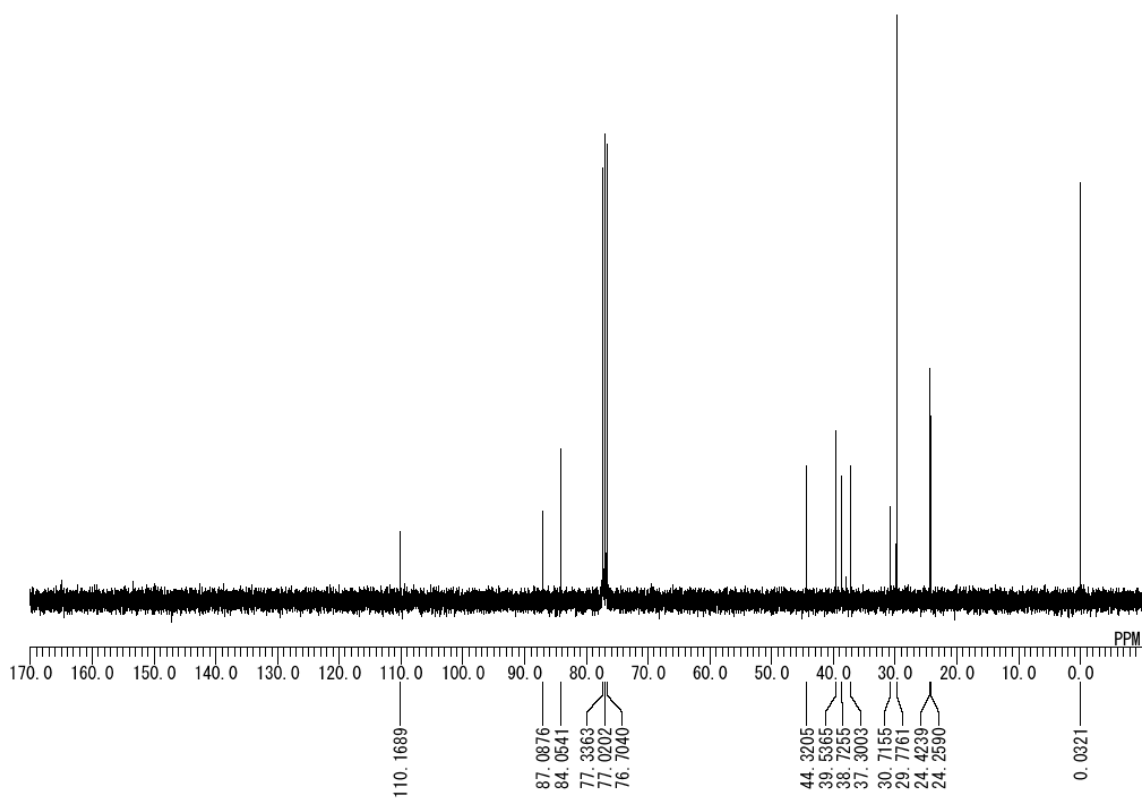

Supplement: b820521c.pdf [file b820521c.pdf]
